# 1 Combined effects of host genetics and diet on human gut microbiota and 2 incident disease in a single population cohort

3  
4 Youwen Qin<sup>1,2</sup>, Aki S. Havulinna<sup>3</sup>, Yang Liu<sup>1,4</sup>, Pekka Jousilahti<sup>3</sup>, Scott C. Ritchie<sup>1,5-7</sup>, Alex Tokolyi<sup>8</sup>,  
5 Jon G. Sanders<sup>9,10</sup>, Liisa Valsta<sup>3</sup>, Marta Brożyna<sup>1</sup>, Qiyun Zhu<sup>11</sup>, Anupriya Tripathi<sup>11,12</sup>, Yoshiki  
6 Vazquez-Baeza<sup>13,14</sup>, Rohit Loomba<sup>15</sup>, Susan Cheng<sup>16</sup>, Mohit Jain<sup>11,13</sup>, Teemu Niiranen<sup>3,17</sup>, Leo Lahti<sup>18</sup>,  
7 Rob Knight<sup>11,13,14</sup>, Veikko Salomaa<sup>3</sup>, Michael Inouye<sup>1,2,5-7,19-21\*</sup>§, Guillaume Méric<sup>1,22\*</sup>§

8  
9 <sup>1</sup>Cambridge Baker Systems Genomics Initiative, Baker Heart and Diabetes Institute, Melbourne, Victoria,  
10 Australia; <sup>2</sup>School of BioSciences, The University of Melbourne, Melbourne, Victoria, Australia; <sup>3</sup>Department of  
11 Public Health Solutions, Finnish Institute for Health and Welfare, Helsinki, Finland; <sup>4</sup>Department of Clinical  
12 Pathology, The University of Melbourne, Melbourne, Victoria, Australia; <sup>5</sup>Cambridge Baker Systems Genomics  
13 Initiative, Department of Public Health and Primary Care, University of Cambridge, UK; <sup>6</sup>British Heart  
14 Foundation Centre of Research Excellence, University of Cambridge, UK; <sup>7</sup>National Institute for Health Research  
15 Cambridge Biomedical Research Centre, University of Cambridge and Cambridge University Hospitals,  
16 Cambridge, UK; <sup>8</sup>Wellcome Sanger Institute, Wellcome Genome Campus, Hinxton, UK; <sup>9</sup>Department of Ecology  
17 and Evolutionary Biology, Cornell University, Ithaca, NY, USA; <sup>10</sup>Cornell Institute for Host-Microbe Interaction  
18 and Disease, Cornell University, Ithaca, NY, USA; <sup>11</sup>Department of Pediatrics, School of Medicine, University of  
19 California San Diego, La Jolla, CA, USA; <sup>12</sup>Division of Biological Sciences, University of California San Diego,  
20 La Jolla, California, USA; <sup>13</sup>Center for Microbiome Innovation, University of California San Diego, La Jolla, CA,  
21 USA; <sup>14</sup>Department of Computer Science & Engineering, Jacobs School of Engineering, University of California  
22 San Diego, La Jolla, CA, USA; <sup>15</sup>NAFLD Research Center, Department of Medicine, University of California San  
23 Diego, La Jolla, CA, USA; <sup>16</sup>Smidt Heart Institute, Cedars-Sinai Medical Center, Los Angeles, CA, USA;  
24 <sup>17</sup>Department of Medicine, Turku University Hospital and University of Turku, Turku, Finland; <sup>18</sup>Department of  
25 Future Technologies, University of Turku, Turku, Finland; <sup>19</sup>British Heart Foundation Cardiovascular  
26 Epidemiology Unit, Department of Public Health and Primary Care, University of Cambridge, UK; <sup>20</sup>Health Data  
27 Research UK Cambridge, Wellcome Genome Campus & University of Cambridge, UK; <sup>21</sup>The Alan Turing  
28 Institute, London, UK; <sup>22</sup>Department of Infectious Diseases, Central Clinical School, Monash University,  
29 Melbourne, Victoria, Australia.

30  
31 § These authors contributed equally

32 \*Corresponding authors: Michael Inouye: [mi336@medschl.cam.ac.uk](mailto:mi336@medschl.cam.ac.uk); Guillaume Méric:  
33 [guillaume.meric@baker.edu.au](mailto:guillaume.meric@baker.edu.au).

34

35 **Abstract**

36

37 Co-evolution between humans and the microbial communities colonizing them has resulted in  
38 an intimate assembly of thousands of microbial species mutualistically living on and in their  
39 body and impacting multiple aspects of host physiology and health. Several studies examining  
40 whether human genetic variation can affect gut microbiota suggest a complex combination of  
41 environmental and host factors. Here, we leverage a single large-scale population-based cohort  
42 of 5,959 genotyped individuals with matched gut microbial shotgun metagenomes, dietary  
43 information and health records up to 16 years post-sampling, to characterize human genetic  
44 variations associated with microbial abundances, and predict possible causal links with various  
45 diseases using Mendelian randomization (MR). Genome-wide association study (GWAS)  
46 identified 583 independent SNP-taxon associations at genome-wide significance ( $p < 5.0 \times 10^{-8}$ ),  
47 which included notable strong associations with *LCT* ( $p = 5.02 \times 10^{-35}$ ), *ABO* ( $p = 1.1 \times 10^{-12}$ ), and  
48 *MED13L* ( $p = 1.84 \times 10^{-12}$ ). A combination of genetics and dietary habits was shown to strongly  
49 shape the abundances of certain key bacterial members of the gut microbiota, and explain their  
50 genetic association. Genetic effects from the *LCT* locus on *Bifidobacterium* and three other  
51 associated taxa significantly differed according to dairy intake. Variation in mucin-degrading  
52 *Faecalicatena lactaris* abundances were associated with *ABO*, highlighting a preferential  
53 utilization of secreted A/B/AB-antigens as energy source in the gut, irrespectively of fibre  
54 intake. *Enterococcus faecalis* levels showed a robust association with a variant in *MED13L*,  
55 with putative links to colorectal cancer. Finally, we identified putative causal relationships  
56 between gut microbes and complex diseases using MR, with a predicted effect of *Morganella*  
57 on major depressive disorder that was consistent with observational incident disease analysis.  
58 Overall, we present striking examples of the intricate relationship between humans and their  
59 gut microbial communities, and highlight important health implications.

60

## 61 **Introduction**

62

63 Humans have co-evolved with the microbial communities that colonize them, resulting in a  
64 complex assembly of thousands of microbial species mutualistically living in their  
65 gastrointestinal tract. A fine-tuned interplay between microbial and human physiologies can  
66 impact multiple aspects of development and health to the point that dysbiosis is often  
67 associated with disease<sup>1-3</sup>. As such, increasing evidence points to the influence of human  
68 genetic variation on the composition and modulation of their gut microbiota.

69

70 Past genetic studies have collectively revealed important host-microbe interactions<sup>4-14</sup>.  
71 Previous twin studies detected significant heritability signal from the presence and abundance  
72 of only a few microbial taxa, such as some *Firmicutes*<sup>15</sup>, suggesting a strong transientness and  
73 variability in gut microbial composition, as well as an important influence from external  
74 factors<sup>6,15-18</sup>. Nonetheless, a well-described association between *Bifidobacterium* levels and  
75 *LCT-MCM6*, governing the phenotype of lactase persistence throughout adulthood in  
76 Europeans, was uncovered in 2015<sup>4</sup> and subsequently replicated by later studies<sup>6,7,9-12</sup>,  
77 suggesting a very strong influence of the evolution of dairy diet in modern humans on their gut  
78 bacteria. Additionally, genes involved in immune and metabolic processes<sup>9</sup> but also disease<sup>19</sup>  
79 were also associated with gut microbial variation. Despite several promising findings,  
80 reproducibility across studies varying in sampling and methods is generally poor, and most  
81 previously reported associations lose significance after multiple testing corrections<sup>20</sup>. The  
82 individual gut microbiota is largely influenced by environmental variables, mostly diet and  
83 medication<sup>21-23</sup>, which could explain a larger proportion of microbiome variance than  
84 identifiable host genetic factors<sup>9,10</sup>. Biological factors could also influence the cross-study  
85 reproducibility of results. GWAS would typically not reproducibly identify genetic  
86 associations with taxa harbouring microbial functions potentially shared by multiple unrelated  
87 species<sup>24,25</sup>. Indeed, a certain degree of functional redundancy has been observed in human gut  
88 microbial communities<sup>25</sup>, which is believed to play a role in the resistance and resilience to  
89 perturbations<sup>26-28</sup>. However, both assembly and functioning in human gut microbial  
90 communities seem to be driven by the presence of a few particular and identifiable keystone  
91 taxa<sup>29</sup>, which exert key ecological and modulatory roles on gut microbial composition  
92 independently of their abundance<sup>30,31</sup>. Such taxa are relatively prevalent across individuals and  
93 thought to be part of the human “core” microbiota<sup>30,31</sup>, which makes them potentially  
94 identifiable through GWAS.

95

96 Increasing sample size in studied populations could yield novel and robustly associated results,  
97 and alleviate the effect of confounding technical or biological factors. This could be achieved  
98 either by performing meta-analyses of GWAS conducted in various populations<sup>12</sup>, or by using  
99 larger cohort datasets. In this study, we used a large single homogenous population cohort with  
100 matching human genotypes and shotgun faecal metagenomes (N=5959; FINRISK 2002  
101 (FR02)) to identify novel genome-wide associations between human genotypes and gut  
102 microbial abundances (**Figure S1**). We further leveraged additional and extensive health  
103 registry and dietary individual data to investigate the effects of diet and genotype on particular  
104 host-microbial associations, and to predict incident disease linked to gut microbial variation.

105

## 106 **Results**

107

### 108 **Genome-wide association analysis of gut microbial taxa**

109

110 Genome-wide association tests were applied to 2,801 microbial taxa and 7,979,834 human  
111 genetic variants from 5,959 individuals enrolled in the FR02 cohort, which includes all taxa

112 discovered to be prevalent in >25% of the cohort (**Methods**). Using a genome-wide  
113 significance threshold ( $p < 5.0 \times 10^{-8}$ ), a total of 478 distinct GTDB taxa, which represented 17%  
114 of all tested taxa and included 11 phyla, 19 classes, 24 orders, 63 families, 148 genera and 213  
115 species, were found to be associated with at least one genetic variant (**Figure 1, Table S1**).  
116 Conditional analysis found 583 independent SNP-taxon associations at genome-wide  
117 significance (**Table S1**). Heritability across the 2,801 taxa ranged between  $h^2 = 0.001$  to 0.214,  
118 with the highest values observed for taxa belonging to the *Firmicutes* and *Firmicutes\_A* GTDB  
119 phyla, both of which encompassed half (241/476, 50.4%) of all associated taxa with genetic  
120 variation (**Figure S2**). There were no differences in SNP heritability between groups of  
121 associated or non-associated taxa at genome-wide significance ( $p = 0.23$ ).

122  
123 Three loci were strongly associated with microbial variation at study-wide significance, as  
124 shown on a Manhattan plot showing the lowest resulting p-value for each SNP tested against  
125 each of the 2,801 taxa (**Figure 1, Table 1**). There was no evidence of excess false positive rate  
126 in the GWAS (median  $\lambda_{GC} = 1.0051$ ) (**Figure 1B**). After conditional analysis, the strongest  
127 association by far ( $p = 5.0 \times 10^{-35}$ ) involved members of class *Actinobacteria* and rs3940549, a  
128 variant in the *LCT-MCM6-ZRANB3* locus region which is in high LD ( $r^2 = 0.87$ ) with the well-  
129 described *LCT* variant rs4988235 causing lactase persistence in adults of European ancestry  
130 (**Figure S3**). In total, 29 taxa were associated with the *LCT-MCM6* region, including 18 below  
131 study-wide significance (**Figure 1, Table S1**). These involved *Bifidobacterium*-related  
132 *Actinobacteriota* and three taxa from the GTDB *Firmicutes\_A* phylum which included 2  
133 uncultured species defined from metagenome-assembled reference genomes (*UBA3855*  
134 *sp900316885* and *CAG-81 sp000435795*) (**Table 1**). The association of these three  
135 *Firmicutes\_A* with *LCT* was still genome-wide significant after adjusting for *Bifidobacterium*  
136 abundances (**Table S2**). A variant in *ABO* (rs545971), expressing the histo-blood  
137 group ABO system transferase, was strongly associated ( $p = 1.1 \times 10^{-12}$ ) with levels of  
138 *Faecalicatena lactaris*. There was evidence for a second independent signal at *ABO* associated  
139 with the *Collinsella* genus (chr9:133271182;  $p = 2.5 \times 10^{-8}$ ) (**Table S1, Figure 1**). Rs187309577  
140 and rs143507801 in *MED13L*, expressing the Mediator complex subunit 13L, were found to be  
141 associated with genus *Enterococcus* ( $p = 1.8 \times 10^{-12}$ ) and the *Enterococcus faecalis* species  
142 ( $p = 7.26 \times 10^{-11}$ ), respectively (**Table S1, Figure 1**).

143

#### 144 **Human gut microbiome keystone taxa are associated with genetic variation**

145

146 In total, we identified 31 distinct genetic variants associated ( $p < 5.0 \times 10^{-8}$ ) with 39 microbial  
147 taxa related to identified keystone species as listed by Banerjee *et al.* (2018)<sup>29,32</sup>, which  
148 included the *Actinobacteria* class<sup>30</sup>, *Helicobacter pylori*<sup>29</sup>, *Bacteroides stercoris*<sup>33</sup>, *Bacteroides*  
149 *thetaiotaomicron*<sup>34</sup>, *Ruminococcus bromii*<sup>35</sup>, *Klebsiella pneumoniae*<sup>36</sup>, *Proteus mirabilis*<sup>36</sup>,  
150 *Akkermansia muciniphila*<sup>31</sup>, and the archaeon *Methanobrevibacter smithii*<sup>37,38</sup> (**Figure 1C**,  
151 **Table S1**). Only one documented keystone species from Banerjee *et al.*<sup>29</sup>, *Bacteroides*  
152 *fragilis*<sup>39</sup>, was not associated with genetic variation in our study. This observation suggests that  
153 keystone species, although defined as exerting selective modulation and not broad effects on  
154 microbiome composition variation, generally associates with human genetic variation,  
155 suggesting an intimate association with the human gut niche, in line with their reported key  
156 ecological roles in microbiome modulation and functioning. Our work highlights novel human  
157 genotypes possibly associated with keystone taxa (**Table S1**), which could further improve our  
158 understanding of their ecology.

159

#### 160 **Combined effect of host genetics and dietary dairy intake on gut levels of *LCT*-associated** 161 **bacteria**

162

163 We compared the abundances of 4 bacterial taxa strongly associated with the *LCT* locus  
164 (*Bifidobacterium* genus, *Negativibacillus* genus, *UBA3855 sp900316885* and *CAG-81*  
165 *sp000435795*) in individuals with different rs4988235 genotypes and dairy diets (**Figure 2A**).  
166 The abundance of *Bifidobacterium* in individuals producing lactase through adulthood  
167 (rs4988235:TT) was unaffected by dairy intake. However, lactose-intolerant individuals  
168 (rs4988235:CC) self-reporting a regular dairy diet had a significant increase in *Bifidobacterium*  
169 abundance ( $p=1.75\times 10^{-13}$ ; Wilcoxon-rank test). An intermediate genotype (rs4988235:CT) was  
170 linked to an intermediate increase (**Figure 2A**). This trend did not seem to be affected by age<sup>40</sup>  
171 (**Figure S4**).

172  
173 An inverse pattern was observed for the abundance distributions of *Negativibacillus* and  
174 uncultured *CAG-81 sp000435795*, for which abundances decreased in lactose intolerant  
175 individuals reporting dairy intake, as compared to rs4988235:TT individuals consuming dairy  
176 products ( $p=0.049$  and  $p=0.041$ , respectively) (**Figure 2A**). Levels of *UBA3855 sp900316885*  
177 were unaffected by a dairy diet in lactose-intolerant individuals but were surprisingly lower in  
178 rs4988235:TT individuals who reported dairy intake ( $p=8.23\times 10^{-5}$ ) (**Figure 2A**). These  
179 opposite and contrasting effects of dairy intake on associated bacterial abundances in lactose-  
180 intolerant individuals could reflect competition for lactose in the gut. Genus *CAG-81*  
181 abundances were the most negatively correlated with those of the other *LCT*-associated taxa  
182 (**Figure S5**), which suggests that this competition could be strong and prevalent enough to  
183 drive co-association at the *LCT* locus, possibly mediated by lactose intake (**Figure 2B**).

184

#### 185 **Functional profiling of CAZymes in 11 *Bifidobacterium* species**

186

187 Of all 11 *Bifidobacterium* species prevalent enough in our study population to be included in  
188 the GWAS, only *B. dentium* was not associated with the *LCT* locus ( $p=1.70\times 10^{-2}$ ), nor was it  
189 co-abundant with any other *Bifidobacterium* species (**Figure S6A**). *B. dentium* has previously  
190 been suggested to have different metabolic abilities<sup>41</sup>. A clustering of carbohydrate-active  
191 enzymes (CAZyme) profiles from reference genomes of all 11 *Bifidobacterium* species  
192 revealed that *B. dentium* clustered apart from the 10 other species, which grouped consistently  
193 with their co-abundance patterns (**Figure S6B**). *B. dentium* harboured more genes encoding  
194 CAZyme families with preferred fiber/plant-related substrates (GH94, GH26, GH53) than  
195 other *Bifidobacterium* species, which seemed to harbour more milk oligosaccharide-targeting  
196 CAZyme families (GH129, GH112) than *B. dentium* (**Figure S6B**), which could relate to the  
197 observed association differences. This suggests that bacterial metabolic abilities can be strong  
198 drivers of co-abundance, and of association with human genetic variation.

199

#### 200 **Functionally distinct *ABO*-associated bacteria are impacted differently by genotype and** 201 **dietary fiber intake**

202

203 A variety of bacteria metabolize blood antigens, with potential applications in synthetic  
204 universal donor blood production<sup>42,43</sup>. Gut bacteria are particularly exposed to A- and B-  
205 antigens in the gut mucosa of secretor individuals<sup>44</sup>. Our associations of *Faecalicatena lactaris*  
206 ( $p=1.10\times 10^{-12}$ ) and *Collinsella* ( $p=2.59\times 10^{-8}$ ) with *ABO* suggest a possible metabolic link with  
207 blood antigens. A comparison of CAZyme profiles across a set of reference genomes revealed  
208 3 CAZymes with blood-related activities in *F. lactaris* (GH110<sup>45</sup>, GH136<sup>46</sup>, CBM32<sup>47</sup>), but  
209 none in any of 9 *Collinsella* species (**Figure 3A**). More mucus-targeting and less fiber-  
210 degrading enzymes were found in *F. lactaris* than *Collinsella* (**Figure 3A**), suggesting distinct  
211 functions in the gut.

212



213 As previously reported<sup>5</sup>, neither ABO blood types, nor secretor status had an impact on alpha  
214 and beta diversity (**Figure S7**). However, we observed that the effect of *ABO* genotypes on *F.*  
215 *lactaris* levels, underlying the association, were largely driven by secretor status, with  
216 increased abundances in secretor individuals from genotype groups rs545971:CT ( $p=3.6\times 10^{-4}$ )  
217 and rs545971:TT ( $p=9\times 10^{-4}$ ), A ( $p=1.24\times 10^{-5}$ ) and AB blood type groups ( $p=1.24\times 10^{-5}$ ), but  
218 not in rs545971:CC genotype ( $p=0.4339$ ), or B and O blood types individuals (**Figure 3B**).  
219 Levels in non-secretors did not vary across *ABO* genotypes or blood types (**Figure 3B**).  
220 Despite a slight increase in blood type A secretors, *Collinsella* only remained minimally  
221 affected by secretor status or blood group (**Figure S8A**). Taken together, this suggests that the  
222 secretion of soluble A and B-antigens strongly affects *F. lactaris* in the gut, possibly through  
223 reduced opportunity to use them as substrate. Both levels of *F. lactaris* and *Collinsella* were  
224 significantly higher when individuals were predicted to secrete A-, B- and AB-antigens in their  
225 gut mucosa ( $p<2.2\times 10^{-16}$  and  $p=1.3\times 10^{-8}$ , respectively) (**Figure S8B**).

226  
227 A high fiber diet is thought to induce a metabolic transition from mucus-degrading to fiber-  
228 degrading activities in the colon, as carbohydrates from fiber are more easily metabolized<sup>48</sup>.  
229 The increase in *F. lactaris* abundances in A/B/AB-secretors (defined as secreting A-, B- and  
230 AB-antigens) compared to non- A/B/AB-secretors remained strongly significant irrespective of  
231 fiber intake ( $p=1.15\times 10^{-9}$  in the low-fiber diet group, and  $p=4.4\times 10^{-3}$  in the high-fiber diet  
232 group), suggesting that either *F. lactaris* has a strong affinity for secreted A/B/AB-antigens,  
233 does not efficiently degrade dietary fiber, or will not easily switch to it as an energy source  
234 (**Figure 3C**). *F. lactaris* levels were increased in non-A/B/AB-secretors with a high fiber diet,  
235 implying a switch to fiber degradation or interaction with fiber-degrading bacteria (**Figure**  
236 **3C**). *Collinsella* variation in both A/B/AB-secretors and non-A/B/AB-secretors with high- and  
237 low-fiber diets was similar to the compounded abundances of 13 major mucin-degrading  
238 species in the human gut<sup>49</sup>, suggesting a similar ecological response in stark contrast with *F.*  
239 *lactaris* (**Figure 3C, Figure 3D**).

#### 240 241 **MED13L association with *Enterococcus faecalis* as a putative link with CRC development**

242  
243 The allele frequency of the *MED13L* rs143507801 variant (A>G), associated with levels of  
244 *Enterococcus faecalis* ( $p=7.26\times 10^{-11}$ ), was low (MAF=0.0111), consistent with reported allele  
245 frequencies in the gnomAD database<sup>50</sup>. In our study population, 131 individuals carried  
246 rs143507801:G allele, 130 being heterozygous (GA) and only one being homozygous (GG).  
247 We observed that *E. faecalis* levels were increased in heterozygous rs143507801:GA  
248 individuals (**Figure 4**). *E. faecalis* is a gut commensal, but also an opportunist pathogen  
249 believed to play a role in colorectal cancer (CRC) development, possibly through direct  
250 damaging of colorectal cells<sup>51-56</sup>. *MED13L* and *MED13* encode for Mediator transcriptional  
251 coactivator complex modules associating with RNA polymerase II<sup>57</sup>, and as such specifically  
252 interact with cyclin-dependent kinase 8 (CDK8) modules described for their oncogenic  
253 activation of transcription during colon tumorigenesis<sup>58</sup>. Consequently, we observed slightly  
254 higher levels of *E. faecalis* ( $p=0.014$ ) in 14 individuals enrolled in FR02 who had prevalent  
255 CRC at the time of sampling (**Figure 4**). Groups of individuals segregated by allelic variant  
256 and CRC status could not be compared robustly due to small sample size. Taken together, these  
257 results suggest a possible link between *E. faecalis* and CRC through the MED13 activation of  
258 CDK8 in colorectal tumours, which will need to be investigated further.

#### 259 260 **Causal inference predictions between microbes and diseases highlight causal effect of** 261 ***Morganella* on MDD**

262

263 Interpreting results of causal inference prediction using bacterial information entails to  
264 particular caution, due to the possibility of multiple and unaccounted confounding factors<sup>11</sup>,  
265 but can be useful to highlight potential focus for future research. Here, we predicted 96 causal  
266 effects in both microbe to disease and disease to microbe directions using bidirectional  
267 Mendelian Randomization (MR). Of these, 34 were from microbial levels as exposure to  
268 disease as outcome, with a large proportion of causal effects in psychiatric and neurological  
269 diseases (**Table S5**). For example, MR suggested an increased abundance of *Faecalicoccus*  
270 may have a causal effect on anorexia nervosa (OR=1.8 per SD increase in bacterial  
271 abundance; CI<sub>95%</sub>=1.3-2.5;  $p=2.0\times 10^{-4}$ , MR method IVW)(**Methods**). Other examples included  
272 increasing abundances of *Morganella* and *Raoultella* predicted to have causal effects on major  
273 depressive disorder (MDD) (**Table S5**). When MR was performed in the reverse direction,  
274 using disease risk as an exposure and microbial levels as an outcome, most predicted causal  
275 effects involved autoimmune and inflammatory diseases but the strongest predicted causal  
276 effect involved type 2 diabetes (T2D) (**Table S6**). Doubling the genetic risk of T2D (possibly  
277 accompanied by external factors such as hypoglycaemic medications or metformin intake) was  
278 predicted to reduce levels of the uncultured *CAG-345 sp000433315* species (*Firmicutes*  
279 phylum) by 0.14 SD (SE=0.04,  $p=3.0\times 10^{-4}$ , MR method IVW). A few other examples included  
280 some degree of literature validation, such as the higher genetic risk for primary sclerosing  
281 cholangitis (PSC) causally impacting levels of the cholesterol-reducing *Eubacterium\_R*  
282 *coprostanoligenes*<sup>59</sup>. Furthermore, a higher genetic risk for coeliac disease (CD) was predicted  
283 to increase abundances in 4 species previously reported to be more abundant in CD patients  
284 than controls<sup>60</sup> (**Table S6**). Finally, a higher genetic risk for multiple sclerosis (MS) was  
285 predicted to cause a reduction in the abundance of *Lactobacillus\_B ruminis*, consistent with the  
286 report that *Lactobacillus sp.* can reduce symptom severity in an animal model of MS<sup>61</sup>.

287  
288 The availability in our study dataset of up to 16 years of electronic health record follow-up  
289 after the initial sampling of the microbiota allowed for observational validation of predicted  
290 effects using MR. Of all causal predictions identified using MR, only the effect of *Morganella*  
291 on MDD could be validated by a statistically significant association with incident MDD  
292 (HR=1.11, CI<sub>95%</sub>=1.01-1.22, per SD increase of bacterial abundance), after accounting for age,  
293 sex and BMI (**Figure 5**). In our GWAS, *Morganella* variation in the study population  
294 associated with a variant (rs192436108;  $p=6.16\times 10^{-8}$ ) in the *PDE1A* locus, which has  
295 previously been linked to depression<sup>62,63</sup> and psychiatric disorders<sup>64</sup>. Taken together, these  
296 predicted links between *Morganella* and MDD suggest more efforts should be deployed into  
297 exploring the possible roles of this bacterium as part of the brain-gut axis metabolic  
298 modulation of health.

299

## 300 **Discussion**

301

302 Here, through GWAS and the subsequent investigation of functional and ecological factors  
303 contributing to the most robust human-microbe associations, we present a diverse and global  
304 picture of human-microbe interactions in a single cohort of ~6,000 European individuals. We  
305 find 3 genetic loci to be strongly associated with gut microbial variation. Two of these loci,  
306 *LCT* and *ABO*, are well-known and very segregated in human populations, possibly explaining  
307 why our homogenous European cohort identified them as being associated so strongly. A third  
308 more mysterious association with the *MED13L* locus highlights possible links with cancer  
309 while predictive causal inference highlights several diseases as being causally linked to gut  
310 microbes.

311

312 **Lactase persistence as a recently evolved strong modulator of gut bacterial abundances**

313

314 Lactase persistence, or the continued ability to digest lactose into adulthood, is the most  
315 strongly selected single-gene trait over the last 10,000 years in multiple human populations<sup>65</sup>,  
316 believed to have spread amongst humans with the advent of animal domestication and the  
317 culturally transmitted practice of dairying<sup>66</sup>. In our study, as in previous work<sup>4,6,7,11,12</sup>, the  
318 association of *LCT* variants with *Actinobacteria*, more specifically *Bifidobacterium*, is by far  
319 the most statistically significant, suggesting a profound interaction between *Actinobacteria* and  
320 the human gut, in line with their reported keystone activities<sup>30</sup>. We reported a strong increase  
321 of *Bifidobacterium* levels in genetically lactose intolerant people reporting a regular  
322 consumption of dairy products<sup>9</sup>. This increase was not confounded by age in adults, despite  
323 *Bifidobacterium* levels generally decreasing with age in our cohort. While self-reported dietary  
324 information is not entirely reliable due to various social reasons<sup>67,68</sup>, our study population was  
325 large, and the differences were significant enough to consider this a robust observation. These  
326 observations can be explained by the evolutionary adaptation of *Bifidobacterium* species to  
327 specifically use human and bovine milk oligosaccharides as an energy source<sup>69</sup>. In adults  
328 unable to produce lactase in their small intestines, consumed lactose is likely to become  
329 available for colonic bacteria as an energy source to compete for (**Figure 3A**). Hints of a  
330 possible competitive relationship between *Bifidobacterium* and *Negativibacillus*, another *LCT*-  
331 associated taxon were revealed, which could be mediated by lactose intake and will need to be  
332 investigated further in functional studies.

333

334 Two interesting questions stem from our findings. First, the genetic determinants of lactose  
335 intolerance are known to vary across ethnicity<sup>70</sup> and cross-population heterogeneity in the  
336 *LCT-Bifidobacterium* association was recently reported<sup>12</sup>. As more non-European-centric  
337 genetic studies are conducted worldwide<sup>12,71,72</sup>, examining this combined interaction between  
338 dairy diet and *Bifidobacterium* in different genetic backgrounds could bring new insights.  
339 Secondly, despite recent progresses, lactose intolerance is still largely underdiagnosed, and  
340 genetic prediction rates from large population studies exceed lactose intolerance prevalence  
341 rates obtained using physical tests<sup>70</sup>. In our work, we lacked information on lactose  
342 malabsorption symptoms in lactose intolerant individuals reporting a regular dairy diet. These  
343 people could experience discomfort symptoms without knowingly implicating their own  
344 lactose intake, but another possibility could be that the ability of *Bifidobacterium* to degrade  
345 lactose may alleviate the perceived symptoms of discomfort associated with lactose  
346 intolerance, therefore encouraging individuals to unknowingly continue consuming lactose that  
347 they would otherwise not be able to digest<sup>73</sup>. This possible probiotic effect would be interesting  
348 to investigate in controlled studies.

349

### 350 **Blood antigen secretion can influence levels of specific gut microbial commensals**

351

352 The *ABO* gene expresses a glycosyltransferase in many cell types, which determines the ABO  
353 blood group of an individual by modifying the oligosaccharides on cell surface glycoproteins.  
354 A comparison of humans and non-human primates has identified *ABO* (along with the MHC)  
355 as harbouring ancient multiallelic polymorphisms that are maintained across species<sup>74,75</sup>.  
356 Evolutionary selective pressures at this locus have been proposed to be linked to pathogen  
357 infection. Indeed, many infectious diseases such as norovirus infection, bacterial meningitis,  
358 malaria, cholera<sup>76</sup>, or even more recently SARS-CoV-2<sup>77,78</sup> are associated with host blood type  
359 and secretor status<sup>76</sup>, suggesting that infection could be a driver of a strong balancing selection  
360 that has maintained *ABO* polymorphisms. Furthermore, blood type variation has been  
361 intriguingly linked to various chronic diseases<sup>76</sup>, such as heart and vascular diseases, gastric  
362 cancers, diabetes, asthma or even dementia<sup>76</sup>. Many of these chronic diseases are also  
363 associated with dysbiosis of the gut microbiota, which prompts interesting but largely  
364 unexplored parallel between gut commensals, blood types and disease<sup>44</sup>. Our study confirms



365 previous findings<sup>5</sup> that secretor status or blood types do not seem to globally affect gut  
366 microbial alpha- or beta-diversity. It also confirms reports from two very recent studies: the  
367 first of these studies, a meta-analysis across five German cohorts, using 16S rRNA sequencing  
368 to characterize the gut microbiota, linked *Bacteroides* and *Faecalibacterium* to *ABO* and  
369 *FUT2*<sup>79</sup>. The second study, taking a functional approach, intriguingly associated bacterial  
370 lactose and galactose degradation genes to *ABO* variation in a cohort of 3,432 Chinese  
371 individuals<sup>80</sup>. Taken together, these findings suggest a broad association of *ABO*  
372 polymorphisms with microbial variation in various human populations.

373  
374 An important research effort aiming to enzymatically produce synthetic universal donor blood  
375 has driven a push for screening a large diversity of CAZymes, including bacteria, revealing  
376 substrate affinities for blood antigens across various microbes<sup>42,43</sup>. Here we highlight *F.*  
377 *lactaris* (formerly *Ruminococcus lactaris*), as a mucin-degrading commensal likely able to  
378 digest blood antigens through its predicted harbouring of GH110, GH136 and CBM32  
379 CAZyme family genes<sup>45-47</sup>. *F. lactaris* is strongly associated with *ABO* genetic variation in our  
380 European cohort, and is differentially abundant in people according to their predicted gut  
381 mucosal secretion of A/B/AB-antigens. Interestingly, our findings are not consistent with *F.*  
382 *lactaris* switching to a fiber-degrading activity in individuals reporting a high fiber diet, unlike  
383 other mucin-degrading bacteria in our study and in the literature<sup>48</sup> and *Collinsella*, another  
384 *ABO*-associated taxon (**Figure 3B**). Our work suggests that some gut commensals such as *F.*  
385 *lactaris* appear to be very efficient and adapted metaboliser of A/B/AB-antigens in the gut,  
386 despite their predicted ability to degrade simpler carbohydrates in fiber. This could be an  
387 example of ecological niche differentiation in the gut, with impacts on associated *F. lactaris*  
388 microbial communities, of which *Collinsella*, also associated with *ABO*, may belong.

### 389 390 **Unexplored links with disease and the nervous system**

391  
392 Although validation of the association is inconclusive because of the low prevalence of CRC  
393 cases and genetic variation in our study population, the association of *MEDI3L* rs143507801  
394 variant with *Enterococcus faecalis* suggested a putative link with CRC. It has been shown that  
395 *MEDI3* could directly link a cyclin-dependent kinase 8 (CDK8) module to Mediator<sup>81,82</sup>,  
396 which is a colorectal cancer oncogene, amplified in colorectal tumours and activating  
397 transcription driving colon tumorigenesis leading to CRC<sup>58</sup>. This could explain a long  
398 suspected link between *Enterococcus faecalis* and development of CRC after having been  
399 found in higher concentrations in CRC patients than healthy individuals<sup>51-55</sup>. The suspected  
400 mode of action of *E. faecalis* on CRC development is currently unclear, but could be linked to  
401 extracellular free radical production directly leading to DNA break, point mutation and  
402 chromosomal instability in colorectal cells<sup>56</sup>. Although we saw a trend of *E. faecalis* being  
403 increased in abundance in prevalent CRC patients, and in *MEDI3L* variation, more focused  
404 work and a larger sample size will be required to precisely pinpoint a link between this  
405 bacterium and CRC through the Mediator complex, if any.

406  
407 Causal inference analysis highlighted a very promising example of interplay between a gut  
408 microbe and a complex disease. Among other suggested links with psychiatric diseases, we  
409 predicted that increasing abundances of *Morganella* and *Raoultella* could have causal effects  
410 on MDD. Members of the *Enterobacteriaceae* family, such as these two genera, have  
411 previously been found in higher levels in MDD patients<sup>83</sup>. Although caution is required when  
412 interpreting predictions of causality<sup>84</sup>, several studies elaborated the gut-brain axis hypothesis,  
413 and increasing evidence suggests that gut microbes are likely to influence host behavior via a  
414 systemic modulation of hormones and metabolites<sup>85-87</sup>. Most importantly, our MR-based  
415 observation was consistent with observed hazards using follow-up observational data up to 16

416 years after initial sampling. This observation supports previous experimental results showing  
417 an increase of IgM and IgA-related immune response against *Morganella* secreted  
418 lipopolysaccharide in major depression<sup>88</sup>. This finding potentially highlights the intimate  
419 influence of the gut-brain axis on humans.

420

421 Our MR analysis suggested that known genetic risks of autoimmune and inflammatory  
422 diseases could also influence gut microbes. One explanation could be that disease susceptibility  
423 would affect host immunity and gut barrier integrity, which may favor an increase in some key  
424 microbes. However, several studies have shown that manipulating gut microbial composition  
425 could be a potential therapy for autoimmune and inflammatory diseases<sup>89</sup>, which would  
426 suggest that composition variation in specific gut microbe maybe a requirement for the  
427 penetration of a disease phenotype<sup>90</sup>. Further mechanistic studies are needed to untangle host-  
428 microbe interactions in disease, and further interpret these predictions.

429

### 430 **The case for larger datasets and including uncultured novel species in metagenomic** 431 **studies**

432

433 Our study highlights the benefits of increasing sample size to increase the statistical power for  
434 discovery. Although the *LCT* locus has been reported multiple times to be associated with  
435 bacterial taxa, our work is the first to report study-wide significant associations in a single  
436 cohort, at the strongest significance ever reported. The association with *Bifidobacterium* in our  
437 study was even stronger than the recent findings that used integrative data from 18,473  
438 individuals in 28 different cohorts<sup>12</sup>, emphasizing the importance of standardized methodology  
439 and homogeneity in participant ethnicity (especially when studying highly geographically  
440 distributed traits such as lactose intolerance traits<sup>91</sup>). *ABO* allelic variation is also notoriously  
441 affected by geography<sup>92</sup>, which could explain why some meta-analyses in non-homogenous  
442 populations could miss it or not. Importantly, metagenomic sequencing with standardized,  
443 robust taxonomic definitions<sup>93,94</sup> can provide species-level characterization of microbial  
444 profiles in the gut of individuals, which is challenging when using 16S rRNA-based studies.  
445 An example from our work is the observation that *Bifidobacterium dentium* was prevalent but  
446 not associated with the *LCT* locus like all other *Bifidobacterium* species in the population.  
447 Observed difference in carbohydrate-active enzymes that are commonly found in other  
448 *Bifidobacterium* species may explain this difference<sup>41</sup>. Furthermore, GTDB taxonomic  
449 standardization results in greater taxon granularity, i.e. smaller, more discrete clades of similar  
450 phylogenetic depth than commonly known lineages or species<sup>93,94</sup>. In theory, this would  
451 increase overall accuracy<sup>95</sup>, as a weak association with a poorly-defined lineage may be caused  
452 by a strong association with a well-defined subset of that lineage, defined as a coherent group  
453 using GTDB<sup>94</sup>. Finally, a myriad of microbial taxa that are to date solely defined and  
454 represented by uncultured metagenome-assembled genomes (MAGs) in the GTDB database  
455 were found to be independently associated with various loci. Along with recent reports that the  
456 more gut microbiome diversity is explored, the more novel, unknown species are  
457 discovered<sup>96,97</sup>, this suggests that many discoveries are yet to be made in the field of human  
458 microbiome studies.

459

## 460 **Material and methods**

461

### 462 **Study population**

463

464 The FINRISK study population has been extensively described elsewhere<sup>98</sup>. FINRISK  
465 population surveys have been performed every 5 years since 1972 to monitor trends in  
466 cardiovascular disease risk factors in the Finnish population<sup>98,99</sup>. The FINRISK 2002 (FR02)  
467 study population has been extensively described elsewhere<sup>98,100</sup>. Briefly, it was based on a  
468 stratified random sample of the Finnish population aged between 25 and 74 years from six  
469 geographical areas of Finland<sup>101</sup>. The sampling was stratified by sex, region and 10-year age  
470 group so that each stratum had 250 participants. The overall participation rate was 65.5% (n =  
471 8,798). Selected participants filled out a questionnaire, then participated in a clinical  
472 examination carried out by specifically trained nurses and gave a blood sample from which  
473 various laboratory measurements were performed. They also received a sampling kit and  
474 instructions to donate a stool sample at home and mailed it to the Finnish Institute for Health  
475 and Welfare in an overnight mail. The follow-up of the cohort took place by record linkage of  
476 the study data with the Finnish national electronic health registers (Hospital Discharge Register  
477 and Causes of Death Register), which provide in practice 100% coverage of relevant health  
478 events in Finnish residents. For present analyses involving follow-up data, we used a follow-up  
479 which extended until 31/12/2018.

480

481 The study protocol of FR02 was approved by the Coordinating Ethical Committee of the  
482 Helsinki and Uusimaa Hospital District (Ref. 558/E3/2001). All participants signed an  
483 informed consent. The study was conducted according to the World Medical Association's  
484 Declaration of Helsinki on ethical principles.

485

### 486 **Cohort phenotype metadata and specific dietary information**

487

488 The phenotype data in this study comprised of demographic characteristics, life habits, disease  
489 history, laboratory test results and follow-up electronic health records (EHRs). More  
490 specifically, baseline dietary factors were collected. Participants were asked to provide answers  
491 to exhaustive diet questionnaires when they were enrolled in the study. Details of the method  
492 have been described previously<sup>99</sup>. To broadly assess diet information within the cohort  
493 participants, a binary variable was used to indicate whether individuals were self-reporting to  
494 follow various possible dietary restrictions. Dietary consumption of specific food product  
495 categories was also reported.

496

### 497 **Self-reporting of lactose-free diet and dietary fibre consumption**

498

499 Allelic distribution at the *LCT-MCM6*:rs4988235 variant responsible for lactase persistence in  
500 Europeans was as following in our study population: 1,936 (35%) individuals had the T/T  
501 allele conferring a lactase persistence phenotype through adulthood, allowing them to digest  
502 lactose, while 981 (18%) individuals had the C/C allele conferring lactose intolerance. Most  
503 individuals (n=2,611, 47%) had the intermediate allele C/T making them likely to be able to  
504 digest lactose. Most individuals reported a regular dairy intake in their diet (n=5,002, 89%),  
505 while 706 (12.5%) individuals reported a regular lactose-free diet.

506

507 A total fiber consumption score was calculated from the questionnaires, reflecting the overall  
508 consumption of a combination of various fiber-rich foods such as high-fiber bread, vegetables  
509 (vegetable foods, fresh and boiled) and berries (fruits, berries and natural juices). The resulting  
510 total fiber index values ranged from 9 (low dietary fiber intake) to 48 (high dietary fiber

511 intake), with a median of 33. Comparisons of the effects of low- vs. high-fiber diets were made  
512 between the 1<sup>st</sup> (n=1,213) and 4<sup>th</sup> (n=1,132) quartiles of the total fiber index.

513

#### 514 **Genotyping, imputation and quality control**

515

516 The genotyping was performed on Illumina genome-wide SNP arrays (the HumanCoreExome  
517 BeadChip, the Human610-Quad BeadChip and the HumanOmniExpress) and has been  
518 described previously<sup>102</sup>. Stringent criteria were applied to remove samples and variants of low  
519 quality. Samples with call rate <95%, sex discrepancies, excess heterozygosity and non-  
520 European ancestry were excluded. Variants with call rate <98%, deviation from Hardy-  
521 Weinberg Equilibrium ( $p < 1 \times 10^{-6}$ ), and minor allele count < 3 were filtered. Data was pre-  
522 phased by using Eagle2 v2.3<sup>103</sup>. Imputation was performed using IMPUTE2 v2.3.0<sup>104</sup> with two  
523 Finnish-population-specific reference panels: 2,690 high-coverage whole-genome sequencing  
524 and 5,092 whole-exome sequencing samples. To evaluate the imputation quality, we compared  
525 the sample allele frequencies with reference populations and examined imputation quality  
526 (INFO scores) distributions. Imputed SNPs with INFO >0.7 were kept for analysis. Post  
527 imputation quality control was carried out by using plink v2.0<sup>105</sup>. Samples with >10% missing  
528 rate were removed. Individuals with extreme height or BMI values were further excluded (31  
529 individuals with height < 1.47m; 5 with BMI > 50 were removed). Both genotyped and imputed  
530 SNPs were kept for analysis if they met the following criteria: call rate >90%, no significant  
531 deviation from Hardy-Weinberg Equilibrium ( $p > 1.0 \times 10^{-6}$ ), and minor allele frequency >1%.  
532 The post-QC dataset comprised 7,980,477 SNPs.

533

#### 534 **Metagenomic sequencing from stool samples**

535

536 Stool samples were collected by participants and mailed overnight to Finnish Institute for  
537 Health and Welfare for storing at -20°C; the samples were sequenced at the University of  
538 California San Diego in 2017. The gut microbiome was characterized by shallow shotgun  
539 metagenomics sequencing with Illumina HiSeq 4000 Systems. We successfully performed  
540 stool shotgun sequencing in n=7,231 individuals. The detailed procedures for DNA extraction,  
541 library preparation and sequence processing have been previously described<sup>101</sup>. Adapter and  
542 host sequences were removed. To preserve the quality of data while retaining most of the  
543 disease cases, samples with a total number of sequenced reads lower than 400,000 were  
544 removed.

545

#### 546 **Taxonomic profiling, quality filtering and data transformation**

547

548 Taxonomic profiling of FR02 metagenomes has been described elsewhere<sup>100,106</sup>. Briefly, raw  
549 shotgun metagenomic sequencing reads were mapped using the *k*-mer-based metagenomic  
550 classification tool Centrifuge<sup>107</sup> to an index database custom-built to encompass reference  
551 genomes that followed the taxonomic nomenclature introduced and updated in the GTDB  
552 release 89<sup>93-95</sup>. This implies that unless specified otherwise, all taxonomic names in our study  
553 refer to their nomenclature in GTDB, which can be related to the original NCBI nomenclature  
554 using the GTDB database server: [https://gtdb.ecogenomic.org/taxon\\_history/](https://gtdb.ecogenomic.org/taxon_history/).

555

556 Gut microbial composition was represented as the relative abundance of taxa. For each  
557 metagenome at phylum, class, order, family, genus and species levels, the relative abundance  
558 of a taxon was computed as the proportion of reads assigned to the clade rooted at this taxon  
559 among total classified reads. The relative abundance of a taxon with no reads assigned in a  
560 metagenome was considered as zero in the corresponding profile. For the purpose of this  
561 association study and because of reduced accuracy and power when considering rare taxa, we



562 focused on common and relatively abundant microbial taxa, defined as prevalent in >25%  
563 studied individuals, and defined with at least 10 mapped reads per individual. For the purpose  
564 of association, and as previous studies have reported that only some microbial taxa are  
565 inheritable<sup>108</sup>, we also removed taxa with zero SNP-heritability. This filtering resulted in a  
566 microbial dataset composed of a total of 2,801 taxa, including 59 phyla, 95 classes, 187 orders,  
567 415 families, 922 genera and 1,123 species.

568

569 Taxonomic profiles derived from sequencing data are by nature compositional because of an  
570 arbitrary total imposed by the instrument<sup>109</sup>. The compositional data of microbial taxa is not  
571 independent and can lead to inappropriate use of linear regression. To overcome this artificial  
572 bias, all relative abundance values were transformed by centre-log-ratio (CLR)<sup>110</sup>. CLR  
573 transformed data can vary in real space and better fit the normality assumption of linear  
574 regression. To minimize the impact of zeros, the reads count profiles were shifted by +1 before  
575 the transformation. This process was performed using the R package *compositions*. When  
576 visually comparing relative abundances in groups of individuals throughout the manuscript, we  
577 used untransformed relative abundances, for better interpretability. Alpha (Shannon index) and  
578 beta (Bray-Curtis distance) diversity were calculated at genus level used functions in the R  
579 package *vegan*.

580

### 581 **Genome-wide association analysis**

582

583 The protocol followed in this study was described elsewhere<sup>111</sup>. Briefly, linear mixed model  
584 (LMM) implemented in BOLT-LMM<sup>112</sup> was used to search for genome-wide associations  
585 accounting for the individual similarity. Since BOLT-LMM only accepts <1 million SNPs in  
586 modelling the genetic relationship matrix, SNPs were pruned at the threshold of  $r^2 < 0.1$   
587 (plink2<sup>105</sup>, command *--indep-pairwise 1000 80 0.1*), resulting in 106,201 independent SNPs.  
588 BOLT-LMM automatically performs leave-one-chromosome-out (LOCO) analysis to avoid  
589 proximal contamination. Although LMM accounts for the cryptic relatedness in individuals,  
590 there are still large population structure cannot be addressed. Thus, the top 10 genetic principal  
591 components (calculated by FlashPCA2<sup>113</sup> based on the pruned SNPs mentioned above) were  
592 included as covariates. Age, gender, and genotyping batch were adjusted. As no genetic variant  
593 was reported to have large effect size on gut microbiota, statistic estimates were based on  
594 infinitesimal model which assumes small non-zero effect for large number of genetic variants.  
595 To identify independent associations, GCTA-COJO<sup>114</sup> was used to conduct approximate  
596 conditional and joint analysis using individual genetic data. Window size was set to 10 Mb,  
597 assuming SNPs on different chromosomes or more than 10 Mb distance are uncorrelated. The  
598 resulting effect size (beta coefficient) indicated the number of standard deviation changes of a  
599 taxon's CLR transformed abundance corresponding to one effective allele increase of SNP.

600

601 As microbes interact non-independently with each other in the gut, as part of larger ecological  
602 and functional communities, matSpDlite<sup>115,116</sup> was used to estimate the number of independent  
603 tests based on eigenvalue variance, the larger the eigenvalue variance the smaller the number  
604 of effective tests. The number of independent tests was 1,328 for 2,801 tested taxa. We used  
605 this information to calculate a Bonferroni-adjusted study-wide significant level for significant  
606 associations, which was set to  $5 \times 10^{-8} / 1328 = 3.8 \times 10^{-11}$ . A genome-wide significant threshold  
607 was set as  $5 \times 10^{-8}$ .

608

### 609 **Prediction of ABO blood groups and secretor status**

610

611 SNP-based typing of ABO histo-blood group was performed. A combination of four SNPs<sup>117</sup>  
612 was used for the prediction, and a 98% concordance with phenotypically typed ABO histo-



613 blood group has been reported for this method<sup>5</sup>. For blood group allele A, the two different  
614 types A1 and A2 were predicted by rs507666 and rs8176704 respectively. Blood group allele B  
615 was inferred from rs8176746 and blood group allele O was predicted by rs687289. As the  
616 combination of these SNPs are exclusive, no haplotype information was needed. To validate  
617 the accuracy of prediction, we compared it with the prediction using a different combination of  
618 SNPs<sup>77</sup>. The two predictions were highly consistent, with over 99.9% concordance. In addition,  
619 the distribution of ABO groups was consistent with the population distribution found in public  
620 database. Secretor status was predicted by the genotype of *FUT2* variant rs601338, where AA  
621 or AG genotypes are secretors and GG genotypes are non-secretors. An 100% concordance  
622 between the variation in rs601338 and secretor status was reported in a study on Finnish  
623 individuals<sup>118</sup>.

624

## 625 **Bidirectional two-sample Mendelian randomization (MR) analysis**

626

627 Causal relationships between diseases and gut microbiota were investigated at genus and  
628 species levels only to maximise interpretability. In total, 213 species and 148 genera associated  
629 with at least one variant at genome-wide significant level ( $p < 1 \times 10^{-8}$ ) were included. GWAS  
630 summary results were collected for 46 diseases from MR-Base<sup>119</sup> (**Table S4**). These included  
631 12 autoimmune or inflammatory diseases, 9 cardiometabolic diseases, 13 psychiatric or  
632 neurological diseases, cardiovascular diseases, 4 bone diseases and 8 cancers. For disease with  
633 more than one GWAS records, the record with the largest sample size was kept.

634

635 Bi-directional causal inference was performed as follows to infer causal effects of microbial  
636 abundance variation (exposure) on disease risk (outcome), and of disease (exposure) on  
637 microbial abundance levels (outcome). To select the SNP instruments for microbial exposures  
638 in our study, we followed recommendations from a previous study showing that associated  
639 SNPs below a significance threshold of  $p < 1 \times 10^{-5}$  had the largest explained variance on  
640 microbial features<sup>120</sup>. For each taxon, GCTA-COJO was used to perform a conditional analysis  
641 to select independently associated SNPs at  $p < 1 \times 10^{-5}$ . SNP instruments for disease exposures  
642 were selected at genome-wide significant threshold ( $p < 5 \times 10^{-8}$ ). Subsequently LD-clumping  
643 with a strict threshold ( $r^2 < 0.001$  in 1000G EUR within 10 Mb windows) was conducted to  
644 select independent instruments with the lowest  $p$  values for taxa and diseases, respectively.

645

646 Effective alleles of all genetic variants were oriented to the risk-increasing alleles of exposures.  
647 For each inference, five different MR methods were used to estimate the causal effect: (1)  
648 inverse variance weighted (IVW)<sup>121</sup>, (2) weighted median<sup>122</sup>, (3) simple mode<sup>123</sup>, (4) weighted  
649 mode<sup>123</sup> and (5) MR-Egger<sup>124</sup>. IVW is the most sensitive method which requires all  
650 instruments are valid. But in reality, it is hard to verify that no any genetic instrument violates  
651 any instrumental assumptions. Weighted median only requires at least half of the instruments  
652 are valid, making its inference robust to the cases where some instruments violating the  
653 assumptions. Simple mode and weighted mode rely on the largest group of similar instruments,  
654 reducing the effects of other instruments especially outliers. MR-Egger allows instruments  
655 having non-zero pleiotropy and provides way to test and estimate the pleiotropy effect in  
656 addition to causal estimate. As these methods are based on different assumptions, the  
657 consistency among them indicates a credible estimate<sup>125</sup>, even if discrepancy in these methods  
658 does not necessarily suggest the absence of causality. A predicted causal estimate was deemed  
659 interesting in our study if: (1) it reached a nominal  $p < 0.05$  for at least three of the five tested  
660 methods (**Table S7**), (2) directionality testing supported the causal direction, and (3) no  
661 significant casual effect in the reverse direction. In addition, MR-PRESSO<sup>126</sup> was used to

662 formally detect and correct for the pleiotropic outliers. Analyses were conducted using the R  
663 package *TwoSampleMR*<sup>119</sup>.

664

### 665 **Cox proportional hazards regression**

666

667 Cox proportional hazards regression was conducted to test the association between baseline  
668 abundance of gut microbe and incident major depression (16 years follow-up, n=181 incident  
669 events). Microbial abundances were CLR-transformed and standardized to zero-mean and unit-  
670 variance. The Cox models were stratified by sex and adjusted for age and log-transformed  
671 BMI, with time-on-study as the time scale. Participants with prevalent major depression at  
672 baseline were excluded. R function *coxph()* in the R package *survival* was used for this  
673 analysis.

674

### 675 **Profiling of carbohydrate-active enzymes (CAZymes) in bacterial genomes**

676

677 The standalone run\_dbCAN2 v2.0.11 tool<sup>127</sup> ([https://github.com/linnabrown/run\\_dbcan](https://github.com/linnabrown/run_dbcan)) was  
678 used to scan for the presence of CAZyme genes from public assembled bacterial genomes  
679 taken from the GTDB release 89 reference. We used a CAZyme reference database taken from  
680 the CAZy database<sup>128</sup> (31<sup>st</sup> July 2019 update). In total, we scanned 327 *Bifidobacterium sp.*, 2  
681 *Faecalicatena lactaris* and 15 *Collinsella sp.* reference genomes included in GTDB release 89.  
682 Three methods were compared as part of the run\_dbCAN2 procedure (HMMER, DIAMOND,  
683 and Hotpep). We considered a positive detection result when all three methods agreed on a  
684 CAZyme family identification. Identification of preferred reported substrates for the various  
685 CAZyme families was done manually from key publications<sup>48,129</sup>, from literature searches and  
686 from the CAZypedia website<sup>130</sup>. Certain CAZyme families have a broad range of substrates,  
687 many of which are still unknown, which results in our reported preferred substrates to be as  
688 accurate as possible, but non-exhaustive.

689

### 690 **Carbon impact and offsetting**

691

692 We used GreenAlgorithms v1.0<sup>131</sup> to estimate that the main computational work in this study  
693 had a carbon impact of at least 531.94 kg CO<sub>2</sub>e, corresponding to 560 tree-months. As a  
694 commitment to the reduction of carbon emissions associated with computation in research, we  
695 consequently funded planting of 30 trees through a local Australian charity, which across their  
696 lifetime will sequester a combined estimated 8,040 kg CO<sub>2</sub>e, or 15 times the amount of CO<sub>2</sub>e  
697 generated by this study.

698

699

## 700 **Acknowledgements**

701

702 We thank all participants of the FINRISK 2002 survey for their contributions to this work. The  
703 FINRISK surveys are mainly funded by budgetary funds from the Finnish Institute for Health  
704 and Welfare with additional funding from several domestic foundations. MI was supported by  
705 the Munz Chair of Cardiovascular Prediction and Prevention. VS was supported by the Finnish  
706 Foundation for Cardiovascular Research. LL was supported by Academy of Finland (decision  
707 295741). ASH was supported by the Academy of Finland, grant no. 321356. RL receives  
708 funding support from NIEHS (5P42ES010337), NCATS (5UL1TR001442), NIDDK  
709 (U01DK061734, R01DK106419, P30DK120515, R01DK121378, R01DK124318), and DOD  
710 PRCRP (W81XWH-18-2-0026). This study was supported by the Victorian Government's  
711 Operational Infrastructure Support (OIS) program, and by core funding from: the UK Medical  
712 Research Council (MR/L003120/1), the British Heart Foundation (RG/13/13/30194;  
713 RG/18/13/33946) and the National Institute for Health Research [Cambridge Biomedical  
714 Research Centre at the Cambridge University Hospitals NHS Foundation Trust] [\*]. This work  
715 was supported by Health Data Research UK, which is funded by the UK Medical Research  
716 Council, Engineering and Physical Sciences Research Council, Economic and Social Research  
717 Council, Department of Health and Social Care (England), Chief Scientist Office of the  
718 Scottish Government Health and Social Care Directorates, Health and Social Care Research  
719 and Development Division (Welsh Government), Public Health Agency (Northern Ireland),  
720 British Heart Foundation and Wellcome. \*The views expressed are those of the authors and not  
721 necessarily those of the NHS, the NIHR or the Department of Health and Social Care.

722

## 723 **Author declaration**

724

725 The study protocol of FINRISK 2002 was approved by the Coordinating Ethical Committee of  
726 the Helsinki and Uusimaa Hospital District (Ref. 558/E3/2001). All participants signed an  
727 informed consent. The study was conducted according to the World Medical Association  
728 Declaration of Helsinki on ethical principles. All necessary patient/participant consent has been  
729 obtained and the appropriate institutional forms have been archived.

730

## 731 **Data Availability**

732

733 The data for the present study are available with a written application to the THL Biobank as  
734 instructed in the website of the Biobank: <https://thl.fi/en/web/thl-biobank/for-researchers>.

735

## 736 **Conflicts of interest**

737

738 VS has consulted for Novo Nordisk and Sanofi and received honoraria from these companies.  
739 He also has ongoing research collaboration with Bayer AG, all unrelated to this study. RL  
740 serves as a consultant or advisory board member for Anylam/Regeneron, Arrowhead  
741 Pharmaceuticals, AstraZeneca, Bird Rock Bio, Boehringer Ingelheim, Bristol-Myer Squibb,  
742 Celgene, Cirus, CohBar, Conatus, Eli Lilly, Galmed, Gemphire, Gilead, Glympse bio, GNI,  
743 GRI Bio, Inpharm, Intercept, Ionis, Janssen Inc., Merck, Metacrine, Inc., NGM  
744 Biopharmaceuticals, Novartis, Novo Nordisk, Pfizer, Prometheus, Promethera, Sanofi,  
745 Siemens and Viking Therapeutics. In addition, his institution has received grant support from  
746 Allergan, Boehringer-Ingelheim, Bristol-Myers Squibb, Cirus, Eli Lilly and Company,  
747 Galectin Therapeutics, Galmed Pharmaceuticals, GE, Genfit, Gilead, Intercept, Grail, Janssen,  
748 Madrigal Pharmaceuticals, Merck, NGM Biopharmaceuticals, NuSirt, Pfizer, pH Pharma,  
749 Prometheus, and Siemens. He is also co-founder of Liponex, Inc.

750

751  
752  
753  
754  
755  
756  
757  
758  
759  
760  
761  
762  
763  
764  
765  
766  
767  
768  
769  
770  
771  
772  
773  
774  
775  
776  
777  
778  
779  
780  
781  
782  
783  
784  
785  
786  
787  
788  
789  
790  
791  
792  
793  
794  
795  
796  
797  
798  
799  
800  
801  
802  
803  
804  
805  
806  
807  
808  
809  
810  
811

## References

1. Khosravi, A. & Mazmanian, S. K. Disruption of the gut microbiome as a risk factor for microbial infections. *Current Opinion in Microbiology* **16**, 221–227 (2013).
2. Belizário, J. E. & Napolitano, M. Human microbiomes and their roles in dysbiosis, common diseases, and novel therapeutic approaches. *Front. Microbiol.* **6**, (2015).
3. Levy, M., Kolodziejczyk, A. A., Thaiss, C. A. & Elinav, E. Dysbiosis and the immune system. *Nat Rev Immunol* **17**, 219–232 (2017).
4. Blekhman, R. *et al.* Host genetic variation impacts microbiome composition across human body sites. *Genome Biol* **16**, 191 (2015).
5. Davenport, E. R. *et al.* ABO antigen and secretor statuses are not associated with gut microbiota composition in 1,500 twins. *BMC Genomics* **17**, 941 (2016).
6. Goodrich, J. K. *et al.* Genetic Determinants of the Gut Microbiome in UK Twins. *Cell Host & Microbe* **19**, 731–743 (2016).
7. Bonder, M. J. *et al.* The effect of host genetics on the gut microbiome. *Nat Genet* **48**, 1407–1412 (2016).
8. Turpin, W. *et al.* Association of host genome with intestinal microbial composition in a large healthy cohort. *Nat Genet* **48**, 1413–1417 (2016).
9. Wang, J. *et al.* Genome-wide association analysis identifies variation in vitamin D receptor and other host factors influencing the gut microbiota. *Nat Genet* **48**, 1396–1406 (2016).
10. Rothschild, D. *et al.* Environment dominates over host genetics in shaping human gut microbiota. *Nature* **555**, 210–215 (2018).
11. Hughes, D. A. *et al.* Genome-wide associations of human gut microbiome variation and implications for causal inference analyses. *Nat Microbiol* **5**, 1079–1087 (2020).
12. Kurilshikov, A. *et al.* Genetics of human gut microbiome composition. <http://biorxiv.org/lookup/doi/10.1101/2020.06.26.173724> (2020) doi:10.1101/2020.06.26.173724.
13. Kolde, R. *et al.* Host genetic variation and its microbiome interactions within the Human Microbiome Project. *Genome Med* **10**, 6 (2018).
14. Rühlemann, M. C. *et al.* Application of the distance-based F test in an mGWAS investigating  $\beta$  diversity of intestinal microbiota identifies variants in *SLC9A8* (NHE8) and 3 other loci. *Gut Microbes* **9**, 68–75 (2018).
15. Goodrich, J. K. *et al.* Human Genetics Shape the Gut Microbiome. *Cell* **159**, 789–799 (2014).
16. Xie, H. *et al.* Shotgun Metagenomics of 250 Adult Twins Reveals Genetic and Environmental Impacts on the Gut Microbiome. *Cell Systems* **3**, 572–584.e3 (2016).
17. Lim, M. Y. *et al.* The effect of heritability and host genetics on the gut microbiota and metabolic syndrome. *Gut* **66**, 1031–1038 (2017).
18. Le Roy, C. I. *et al.* Heritable components of the human fecal microbiome are associated with visceral fat. *Gut Microbes* **9**, 61–67 (2018).
19. Goodrich, J. K., Davenport, E. R., Clark, A. G. & Ley, R. E. The Relationship Between the Human Genome and Microbiome Comes into View. *Annu. Rev. Genet.* **51**, 413–433 (2017).
20. Kurilshikov, A., Wijmenga, C., Fu, J. & Zhernakova, A. Host Genetics and Gut Microbiome: Challenges and Perspectives. *Trends in Immunology* **38**, 633–647 (2017).
21. David, L. A. *et al.* Diet rapidly and reproducibly alters the human gut microbiome. *Nature* **505**, 559–563 (2014).
22. Falony, G. *et al.* Population-level analysis of gut microbiome variation. *Science* **352**, 560–564 (2016).
23. Zhernakova, A. *et al.* Population-based metagenomics analysis reveals markers for gut microbiome composition and diversity. *Science* **352**, 565–569 (2016).
24. Eng, A. & Borenstein, E. Taxa-function robustness in microbial communities. *Microbiome* **6**, 45 (2018).
25. Ferrer, M. *et al.* Microbiota from the distal guts of lean and obese adolescents exhibit partial functional redundancy besides clear differences in community structure: Metaproteomic insights associated to human obesity. *Environ Microbiol* **15**, 211–226 (2013).
26. Moya, A. & Ferrer, M. Functional Redundancy-Induced Stability of Gut Microbiota Subjected to Disturbance. *Trends in Microbiology* **24**, 402–413 (2016).
27. Louca, S. *et al.* Function and functional redundancy in microbial systems. *Nat Ecol Evol* **2**, 936–943 (2018).
28. Louca, S. *et al.* High taxonomic variability despite stable functional structure across microbial communities. *Nat Ecol Evol* **1**, 0015 (2017).
29. Banerjee, S., Schlaeppli, K. & van der Heijden, M. G. A. Keystone taxa as drivers of microbiome structure and functioning. *Nat Rev Microbiol* **16**, 567–576 (2018).
30. Trosvik, P. & de Muinck, E. J. Ecology of bacteria in the human gastrointestinal tract—identification of keystone and foundation taxa. *Microbiome* **3**, 44 (2015).
31. Shetty, S. A., Hugenholtz, F., Lahti, L., Smidt, H. & de Vos, W. M. Intestinal microbiome landscaping: insight in community assemblage and implications for microbial modulation strategies. *FEMS Microbiol. Rev.* **41**, 182–199 (2017).



- 812 32. Chia, L. W. *et al.* Deciphering the trophic interaction between Akkermansia muciniphila and the  
813 butyrogenic gut commensal Anaerostipes caccae using a metatranscriptomic approach. *Antonie van*  
814 *Leeuwenhoek* **111**, 859–873 (2018).
- 815 33. Fisher, C. K. & Mehta, P. Identifying Keystone Species in the Human Gut Microbiome from Metagenomic  
816 Timeseries Using Sparse Linear Regression. *PLoS ONE* **9**, e102451 (2014).
- 817 34. Curtis, M. M. *et al.* The Gut Commensal Bacteroides thetaiotaomicron Exacerbates Enteric Infection  
818 through Modification of the Metabolic Landscape. *Cell Host & Microbe* **16**, 759–769 (2014).
- 819 35. Ze, X., Duncan, S. H., Louis, P. & Flint, H. J. Ruminococcus bromii is a keystone species for the  
820 degradation of resistant starch in the human colon. *ISME J* **6**, 1535–1543 (2012).
- 821 36. Garrett, W. S. *et al.* Enterobacteriaceae Act in Concert with the Gut Microbiota to Induce Spontaneous and  
822 Maternally Transmitted Colitis. *Cell Host & Microbe* **8**, 292–300 (2010).
- 823 37. Hajishengallis, G., Darveau, R. P. & Curtis, M. A. The keystone-pathogen hypothesis. *Nat Rev Microbiol*  
824 **10**, 717–725 (2012).
- 825 38. Ley, R. E., Peterson, D. A. & Gordon, J. I. Ecological and Evolutionary Forces Shaping Microbial Diversity  
826 in the Human Intestine. *Cell* **124**, 837–848 (2006).
- 827 39. Wu, S. *et al.* A human colonic commensal promotes colon tumorigenesis via activation of T helper type 17  
828 T cell responses. *Nat Med* **15**, 1016–1022 (2009).
- 829 40. Kato, K. *et al.* Age-Related Changes in the Composition of Gut Bifidobacterium Species. *Curr Microbiol*  
830 **74**, 987–995 (2017).
- 831 41. Engevik, M. A. *et al.* Bifidobacterium dentium Fortifies the Intestinal Mucus Layer via Autophagy and  
832 Calcium Signaling Pathways. *mBio* **10**, e01087-19, /mbio/10/3/mBio.01087-19.atom (2019).
- 833 42. Rahfeld, P. & Withers, S. G. Toward universal donor blood: Enzymatic conversion of A and B to O type. *J.*  
834 *Biol. Chem.* **295**, 325–334 (2020).
- 835 43. Liu, Q. P. *et al.* Bacterial glycosidases for the production of universal red blood cells. *Nat Biotechnol* **25**,  
836 454–464 (2007).
- 837 44. Arnolds, K. L., Martin, C. G. & Lozupone, C. A. Blood type and the microbiome- untangling a complex  
838 relationship with lessons from pathogens. *Current Opinion in Microbiology* **56**, 59–66 (2020).
- 839 45. Liu, Q. P. *et al.* Identification of a GH110 Subfamily of  $\alpha$ 1,3-Galactosidases: NOVEL ENZYMES FOR  
840 REMOVAL OF THE  $\alpha$ 3GAL XENOTRANSPLANTATION ANTIGEN. *J. Biol. Chem.* **283**, 8545–8554  
841 (2008).
- 842 46. Pichler, M. J. *et al.* Butyrate producing colonic Clostridiales metabolise human milk oligosaccharides and  
843 cross feed on mucin via conserved pathways. *Nat Commun* **11**, 3285 (2020).
- 844 47. Ficko-Blean, E. & Boraston, A. B. The Interaction of a Carbohydrate-binding Module from a *Clostridium*  
845 *perfringens* N -Acetyl- $\beta$ -hexosaminidase with Its Carbohydrate Receptor. *J. Biol. Chem.* **281**, 37748–37757  
846 (2006).
- 847 48. Desai, M. S. *et al.* A Dietary Fiber-Deprived Gut Microbiota Degrades the Colonic Mucus Barrier and  
848 Enhances Pathogen Susceptibility. *Cell* **167**, 1339-1353.e21 (2016).
- 849 49. Tailford, L. E., Crost, E. H., Kavanaugh, D. & Juge, N. Mucin glycan foraging in the human gut  
850 microbiome. *Front. Genet.* **6**, (2015).
- 851 50. Genome Aggregation Database Consortium *et al.* The mutational constraint spectrum quantified from  
852 variation in 141,456 humans. *Nature* **581**, 434–443 (2020).
- 853 51. Jahani-Sherafat, S., Alebouyeh, M., Moghim, S., Ahmadi Amoli, H. & Ghasemian-Safaei, H. Role of gut  
854 microbiota in the pathogenesis of colorectal cancer; a review article. *Gastroenterol Hepatol Bed Bench* **11**,  
855 101–109 (2018).
- 856 52. Amamani, R. & Rapose, A. Colon cancer and enterococcus bacteremia co-affection: A dangerous alliance.  
857 *Journal of Infection and Public Health* **10**, 681–684 (2017).
- 858 53. Pillar, C., M. Enterococcal virulence - pathogenicity island of E. Faecalis. *Front Biosci* **9**, 2335 (2004).
- 859 54. Khan, Z., Siddiqui, N. & Saif, M. W. *Enterococcus Faecalis* Infective Endocarditis and Colorectal  
860 Carcinoma: Case of New Association Gaining Ground. *Gastroenterol Res* **11**, 238–240 (2018).
- 861 55. De Almeida, C. *et al.* Differential Responses of Colorectal Cancer Cell Lines to Enterococcus faecalis'  
862 Strains Isolated from Healthy Donors and Colorectal Cancer Patients. *JCM* **8**, 388 (2019).
- 863 56. Huycke, M. M., Abrams, V. & Moore, D. R. Enterococcus faecalis produces extracellular superoxide and  
864 hydrogen peroxide that damages colonic epithelial cell DNA. *Carcinogenesis* **23**, 529–536 (2002).
- 865 57. Allen, B. L. & Taatjes, D. J. The Mediator complex: a central integrator of transcription. *Nat Rev Mol Cell*  
866 *Biol* **16**, 155–166 (2015).
- 867 58. Firestein, R. *et al.* CDK8 is a colorectal cancer oncogene that regulates  $\beta$ -catenin activity. *Nature* **455**, 547–  
868 551 (2008).
- 869 59. Li, L., Batt, S. M., Wannemuehler, M., Dispirito, A. & Beitz, D. C. Effect of feeding of a cholesterol-  
870 reducing bacterium, Eubacterium coprostanoligenes, to germ-free mice. *Lab. Anim. Sci.* **48**, 253–255  
871 (1998).
- 872 60. Marasco, G. *et al.* Gut Microbiota and Celiac Disease. *Dig Dis Sci* **61**, 1461–1472 (2016).



- 873 61. Lavasani, S. *et al.* A Novel Probiotic Mixture Exerts a Therapeutic Effect on Experimental Autoimmune  
874 Encephalomyelitis Mediated by IL-10 Producing Regulatory T Cells. *PLoS ONE* **5**, e9009 (2010).
- 875 62. Tomita, H. *et al.* G protein-linked signaling pathways in bipolar and major depressive disorders. *Front.*  
876 *Genet.* **4**, (2013).
- 877 63. Wong, M.-L. *et al.* Phosphodiesterase genes are associated with susceptibility to major depression and  
878 antidepressant treatment response. *Proceedings of the National Academy of Sciences* **103**, 15124–15129  
879 (2006).
- 880 64. Schork, A. J. *et al.* A genome-wide association study of shared risk across psychiatric disorders implicates  
881 gene regulation during fetal neurodevelopment. *Nat Neurosci* **22**, 353–361 (2019).
- 882 65. Burger, J. *et al.* Low Prevalence of Lactase Persistence in Bronze Age Europe Indicates Ongoing Strong  
883 Selection over the Last 3,000 Years. *Current Biology* S0960982220311878 (2020)  
884 doi:10.1016/j.cub.2020.08.033.
- 885 66. Gerbault, P. *et al.* Evolution of lactase persistence: an example of human niche construction. *Phil. Trans. R.*  
886 *Soc. B* **366**, 863–877 (2011).
- 887 67. Hebert, J. R. *et al.* Social Desirability Trait Influences on Self-Reported Dietary Measures among Diverse  
888 Participants in a Multicenter Multiple Risk Factor Trial. *The Journal of Nutrition* **138**, 226S–234S (2008).
- 889 68. Schoeller, D. A. How Accurate Is Self-Reported Dietary Energy Intake? *Nutrition Reviews* **48**, 373–379  
890 (2009).
- 891 69. Sakanaka, M. *et al.* Evolutionary adaptation in fucosyllactose uptake systems supports bifidobacteria-infant  
892 symbiosis. *Sci. Adv.* **5**, eaaw7696 (2019).
- 893 70. Storhaug, C. L., Fosse, S. K. & Fadnes, L. T. Country, regional, and global estimates for lactose  
894 malabsorption in adults: a systematic review and meta-analysis. *The Lancet Gastroenterology &*  
895 *Hepatology* **2**, 738–746 (2017).
- 896 71. Liu, X. *et al.* M-GWAS for the gut microbiome in Chinese adults illuminates on complex diseases.  
897 <http://biorxiv.org/lookup/doi/10.1101/736413> (2019) doi:10.1101/736413.
- 898 72. Sirugo, G., Williams, S. M. & Tishkoff, S. A. The Missing Diversity in Human Genetic Studies. *Cell* **177**,  
899 26–31 (2019).
- 900 73. Szilagy, A. Adaptation to Lactose in Lactase Non Persistent People: Effects on Intolerance and the  
901 Relationship between Dairy Food Consumption and Evaluation of Diseases. *Nutrients* **7**, 6751–6779 (2015).
- 902 74. Ségurel, L., Gao, Z. & Przeworski, M. Ancestry runs deeper than blood: The evolutionary history of ABO  
903 points to cryptic variation of functional importance: Insights & Perspective. *BioEssays* n/a-n/a (2013)  
904 doi:10.1002/bies.201300030.
- 905 75. Segurel, L. *et al.* The ABO blood group is a trans-species polymorphism in primates. *Proceedings of the*  
906 *National Academy of Sciences* **109**, 18493–18498 (2012).
- 907 76. Ewald, D. R. & Sumner, S. C. J. Blood type biochemistry and human disease: Blood type biochemistry and  
908 human disease. *WIREs Syst Biol Med* **8**, 517–535 (2016).
- 909 77. Ellinghaus, D. *et al.* Genomewide Association Study of Severe Covid-19 with Respiratory Failure. *N Engl J*  
910 *Med* NEJMoa2020283 (2020) doi:10.1056/NEJMoa2020283.
- 911 78. Shelton, J. F. *et al.* Trans-ethnic analysis reveals genetic and non-genetic associations with COVID-19  
912 susceptibility and severity. <http://medrxiv.org/lookup/doi/10.1101/2020.09.04.20188318> (2020)  
913 doi:10.1101/2020.09.04.20188318.
- 914 79. Rühlemann, M. C. *et al.* ABO histo-blood groups influence gut microbiome, with causal relationship  
915 between *Bacteroides* and inflammatory bowel disease.  
916 <http://medrxiv.org/lookup/doi/10.1101/2020.07.09.20148627> (2020) doi:10.1101/2020.07.09.20148627.
- 917 80. Liu, X. *et al.* Inter-determination of blood metabolite levels and gut microbiome supported by Mendelian  
918 randomization. <http://biorxiv.org/lookup/doi/10.1101/2020.06.30.181438> (2020)  
919 doi:10.1101/2020.06.30.181438.
- 920 81. Knuesel, M. T., Meyer, K. D., Bernecky, C. & Taatjes, D. J. The human CDK8 subcomplex is a molecular  
921 switch that controls Mediator coactivator function. *Genes & Development* **23**, 439–451 (2009).
- 922 82. Tsai, K.-L. *et al.* A conserved Mediator–CDK8 kinase module association regulates Mediator–RNA  
923 polymerase II interaction. *Nat Struct Mol Biol* **20**, 611–619 (2013).
- 924 83. Jiang, H. *et al.* Altered fecal microbiota composition in patients with major depressive disorder. *Brain,*  
925 *Behavior, and Immunity* **48**, 186–194 (2015).
- 926 84. Wade, K. H. & Hall, L. J. Improving causality in microbiome research: can human genetic epidemiology  
927 help? *Wellcome Open Res* **4**, 199 (2020).
- 928 85. Foster, J. A. & McVey Neufeld, K.-A. Gut–brain axis: how the microbiome influences anxiety and  
929 depression. *Trends in Neurosciences* **36**, 305–312 (2013).
- 930 86. Fung, T. C., Olson, C. A. & Hsiao, E. Y. Interactions between the microbiota, immune and nervous systems  
931 in health and disease. *Nat Neurosci* **20**, 145–155 (2017).
- 932 87. Valles-Colomer, M. *et al.* The neuroactive potential of the human gut microbiota in quality of life and  
933 depression. *Nat Microbiol* **4**, 623–632 (2019).

- 934 88. Maes, M., Kubera, M. & Leunis, J.-C. The gut-brain barrier in major depression: intestinal mucosal  
935 dysfunction with an increased translocation of LPS from gram negative enterobacteria (leaky gut) plays a  
936 role in the inflammatory pathophysiology of depression. *Neuro Endocrinol. Lett.* **29**, 117–124 (2008).  
937 89. Marchesi, J. R. *et al.* The gut microbiota and host health: a new clinical frontier. *Gut* **65**, 330–339 (2016).  
938 90. Ruff, W. E., Greiling, T. M. & Kriegel, M. A. Host–microbiota interactions in immune-mediated diseases.  
939 *Nat Rev Microbiol* **18**, 521–538 (2020).  
940 91. Mattar, R., Mazo & Carrilho. Lactose intolerance: diagnosis, genetic, and clinical factors. *CEG* 113 (2012)  
941 doi:10.2147/CEG.S32368.  
942 92. Bodmer, W. Genetic Characterization of Human Populations: From ABO to a Genetic Map of the British  
943 People. *Genetics* **199**, 267–279 (2015).  
944 93. Parks, D. H. *et al.* A standardized bacterial taxonomy based on genome phylogeny substantially revises the  
945 tree of life. *Nat Biotechnol* **36**, 996–1004 (2018).  
946 94. Parks, D. H. *et al.* A complete domain-to-species taxonomy for Bacteria and Archaea. *Nat Biotechnol*  
947 (2020) doi:10.1038/s41587-020-0501-8.  
948 95. Méric, G., Wick, R. R., Watts, S. C., Holt, K. E. & Inouye, M. *Correcting index databases improves*  
949 *metagenomic studies*. <http://biorxiv.org/lookup/doi/10.1101/712166> (2019) doi:10.1101/712166.  
950 96. Pasolli, E. *et al.* Extensive Unexplored Human Microbiome Diversity Revealed by Over 150,000 Genomes  
951 from Metagenomes Spanning Age, Geography, and Lifestyle. *Cell* **176**, 649–662.e20 (2019).  
952 97. Almeida, A. *et al.* A unified catalog of 204,938 reference genomes from the human gut microbiome. *Nat*  
953 *Biotechnol* (2020) doi:10.1038/s41587-020-0603-3.  
954 98. Borodulin, K. *et al.* Cohort Profile: The National FINRISK Study. *International Journal of Epidemiology*  
955 **47**, 696–696i (2018).  
956 99. Borodulin, K. *et al.* Forty-year trends in cardiovascular risk factors in Finland. *The European Journal of*  
957 *Public Health* **25**, 539–546 (2015).  
958 100. Liu, Y. *et al.* *Early prediction of liver disease using conventional risk factors and gut microbiome-*  
959 *augmented gradient boosting*. <http://medrxiv.org/lookup/doi/10.1101/2020.06.24.20138933> (2020)  
960 doi:10.1101/2020.06.24.20138933.  
961 101. Salosensaari, A. *et al.* *Taxonomic Signatures of Long-Term Mortality Risk in Human Gut Microbiota*.  
962 <http://medrxiv.org/lookup/doi/10.1101/2019.12.30.19015842> (2020) doi:10.1101/2019.12.30.19015842.  
963 102. FinnGen *et al.* Polygenic and clinical risk scores and their impact on age at onset and prediction of  
964 cardiometabolic diseases and common cancers. *Nat Med* **26**, 549–557 (2020).  
965 103. Loh, P.-R. *et al.* Reference-based phasing using the Haplotype Reference Consortium panel. *Nat Genet* **48**,  
966 1443–1448 (2016).  
967 104. Howie, B., Fuchsberger, C., Stephens, M., Marchini, J. & Abecasis, G. R. Fast and accurate genotype  
968 imputation in genome-wide association studies through pre-phasing. *Nat Genet* **44**, 955–959 (2012).  
969 105. Chang, C. C. *et al.* Second-generation PLINK: rising to the challenge of larger and richer datasets. *GigaSci*  
970 **4**, 7 (2015).  
971 106. Ruuskanen, M. O. *et al.* *Links between gut microbiome composition and fatty liver disease in a large*  
972 *population sample*. <http://medrxiv.org/lookup/doi/10.1101/2020.07.30.20164962> (2020)  
973 doi:10.1101/2020.07.30.20164962.  
974 107. Kim, D., Song, L., Breitwieser, F. P. & Salzberg, S. L. Centrifuge: rapid and sensitive classification of  
975 metagenomic sequences. *Genome Res.* **26**, 1721–1729 (2016).  
976 108. Goodrich, J. K., Davenport, E. R., Waters, J. L., Clark, A. G. & Ley, R. E. Cross-species comparisons of  
977 host genetic associations with the microbiome. *Science* **352**, 532–535 (2016).  
978 109. Gloor, G. B., Macklaim, J. M., Pawlowsky-Glahn, V. & Egozcue, J. J. Microbiome Datasets Are  
979 Compositional: And This Is Not Optional. *Front. Microbiol.* **8**, 2224 (2017).  
980 110. Aitchison, J., Barceló-Vidal, C., Martín-Fernández, J. A. & Pawlowsky-Glahn, V. [No title found].  
981 *Mathematical Geology* **32**, 271–275 (2000).  
982 111. Qin, Y. *et al.* *Genome-wide association and Mendelian randomization analysis prioritizes bioactive*  
983 *metabolites with putative causal effects on common diseases*.  
984 <http://medrxiv.org/lookup/doi/10.1101/2020.08.01.20166413> (2020) doi:10.1101/2020.08.01.20166413.  
985 112. Loh, P.-R. *et al.* Efficient Bayesian mixed-model analysis increases association power in large cohorts. *Nat*  
986 *Genet* **47**, 284–290 (2015).  
987 113. Abraham, G., Qiu, Y. & Inouye, M. FlashPCA2: principal component analysis of Biobank-scale genotype  
988 datasets. *Bioinformatics* **33**, 2776–2778 (2017).  
989 114. Genetic Investigation of ANthropometric Traits (GIANT) Consortium *et al.* Conditional and joint multiple-  
990 SNP analysis of GWAS summary statistics identifies additional variants influencing complex traits. *Nat*  
991 *Genet* **44**, 369–375 (2012).  
992 115. Li, J. & Ji, L. Adjusting multiple testing in multilocus analyses using the eigenvalues of a correlation  
993 matrix. *Heredity* **95**, 221–227 (2005).

- 994 116. Nyholt, D. R. A Simple Correction for Multiple Testing for Single-Nucleotide Polymorphisms in Linkage  
995 Disequilibrium with Each Other. *The American Journal of Human Genetics* **74**, 765–769 (2004).  
996 117. Paré, G. *et al.* Novel Association of ABO Histo-Blood Group Antigen with Soluble ICAM-1: Results of a  
997 Genome-Wide Association Study of 6,578 Women. *PLoS Genet* **4**, e1000118 (2008).  
998 118. Wacklin, P. *et al.* Secretor Genotype (FUT2 gene) Is Strongly Associated with the Composition of  
999 Bifidobacteria in the Human Intestine. *PLoS ONE* **6**, e20113 (2011).  
1000 119. Hemani, G. *et al.* The MR-Base platform supports systematic causal inference across the human phenome.  
1001 *eLife* **7**, e34408 (2018).  
1002 120. Sanna, S. *et al.* Causal relationships among the gut microbiome, short-chain fatty acids and metabolic  
1003 diseases. *Nat Genet* **51**, 600–605 (2019).  
1004 121. Burgess, S., Butterworth, A. & Thompson, S. G. Mendelian Randomization Analysis With Multiple Genetic  
1005 Variants Using Summarized Data: Mendelian Randomization Using Summarized Data. *Genet. Epidemiol.*  
1006 **37**, 658–665 (2013).  
1007 122. Bowden, J., Davey Smith, G., Haycock, P. C. & Burgess, S. Consistent Estimation in Mendelian  
1008 Randomization with Some Invalid Instruments Using a Weighted Median Estimator. *Genet. Epidemiol.* **40**,  
1009 304–314 (2016).  
1010 123. Hartwig, F. P., Davey Smith, G. & Bowden, J. Robust inference in summary data Mendelian randomization  
1011 via the zero modal pleiotropy assumption. *International Journal of Epidemiology* **46**, 1985–1998 (2017).  
1012 124. Bowden, J., Davey Smith, G. & Burgess, S. Mendelian randomization with invalid instruments: effect  
1013 estimation and bias detection through Egger regression. *International Journal of Epidemiology* **44**, 512–525  
1014 (2015).  
1015 125. Burgess, S. *et al.* Guidelines for performing Mendelian randomization investigations. *Wellcome Open Res*  
1016 **4**, 186 (2020).  
1017 126. Verbanck, M., Chen, C.-Y., Neale, B. & Do, R. Detection of widespread horizontal pleiotropy in causal  
1018 relationships inferred from Mendelian randomization between complex traits and diseases. *Nat Genet* **50**,  
1019 693–698 (2018).  
1020 127. Zhang, H. *et al.* dbCAN2: a meta server for automated carbohydrate-active enzyme annotation. *Nucleic*  
1021 *Acids Research* **46**, W95–W101 (2018).  
1022 128. Cantarel, B. L. *et al.* The Carbohydrate-Active EnZymes database (CAZy): an expert resource for  
1023 Glycogenomics. *Nucleic Acids Research* **37**, D233–D238 (2009).  
1024 129. Cantarel, B. L., Lombard, V. & Henrissat, B. Complex Carbohydrate Utilization by the Healthy Human  
1025 Microbiome. *PLoS ONE* **7**, e28742 (2012).  
1026 130. The CAZypedia Consortium. Ten years of CAZypedia: a living encyclopedia of carbohydrate-active  
1027 enzymes. *Glycobiology* **28**, 3–8 (2018).  
1028 131. Lannelongue, L., Grealey, J. & Inouye, M. Green Algorithms: Quantifying the carbon emissions of  
1029 computation. *arXiv:2007.07610 [cs]* (2020).  
1030

1031 **Main figure and tables**

1032  
 1033 **Figure 1. Genome-wide association of human genetic and gut microbial variations.** (A) Manhattan plot aggregating the top associations with microbial variation. Each  
 1034 SNP was tested against each of the 2,801 taxa and the Manhattan plot shows the lowest resulting p-value for each SNP. Loci with associations above study-wide significance  
 1035 level ( $p < 3.8 \times 10^{-11}$ ; red dashed line) are annotated with the human locus name and the corresponding associated microbial taxa. The blue dashed line denotes genome-wide  
 1036 significance level ( $p < 5 \times 10^{-8}$ ). (B) The distribution of genomic inflation factor ( $\lambda_{GC}$ ) in 2,801 tested taxa [median( $\lambda_{GC}$ )=1.0051; mean( $\lambda_{GC}$ )=1.0059]. (C) Tree-based  
 1037 visualization of the taxonomic diversity of genome-wide associated microbial taxa. The central root of the tree represents the Bacteria domain, the first connected node  
 1038 represents phylum, the second connected node class, the third order and the fourth family. Every node represents at least one associated taxa in the GWAS at genome-wide  
 1039 significance level. The three smaller trees on the right highlight all taxonomic groups containing at least one taxon identified as associated with the *LCT-MCM6*, *ABO*, and  
 1040 *MED13L* loci (blue edges and nodes denote taxa associated at study-wide significance level and purple edges and nodes denote taxa associated at genome-wide significance  
 1041 level). The main tree is annotated to indicate phyla harbouring >10 distinct genome-wide associated taxa, as well as previously described keystone taxa.

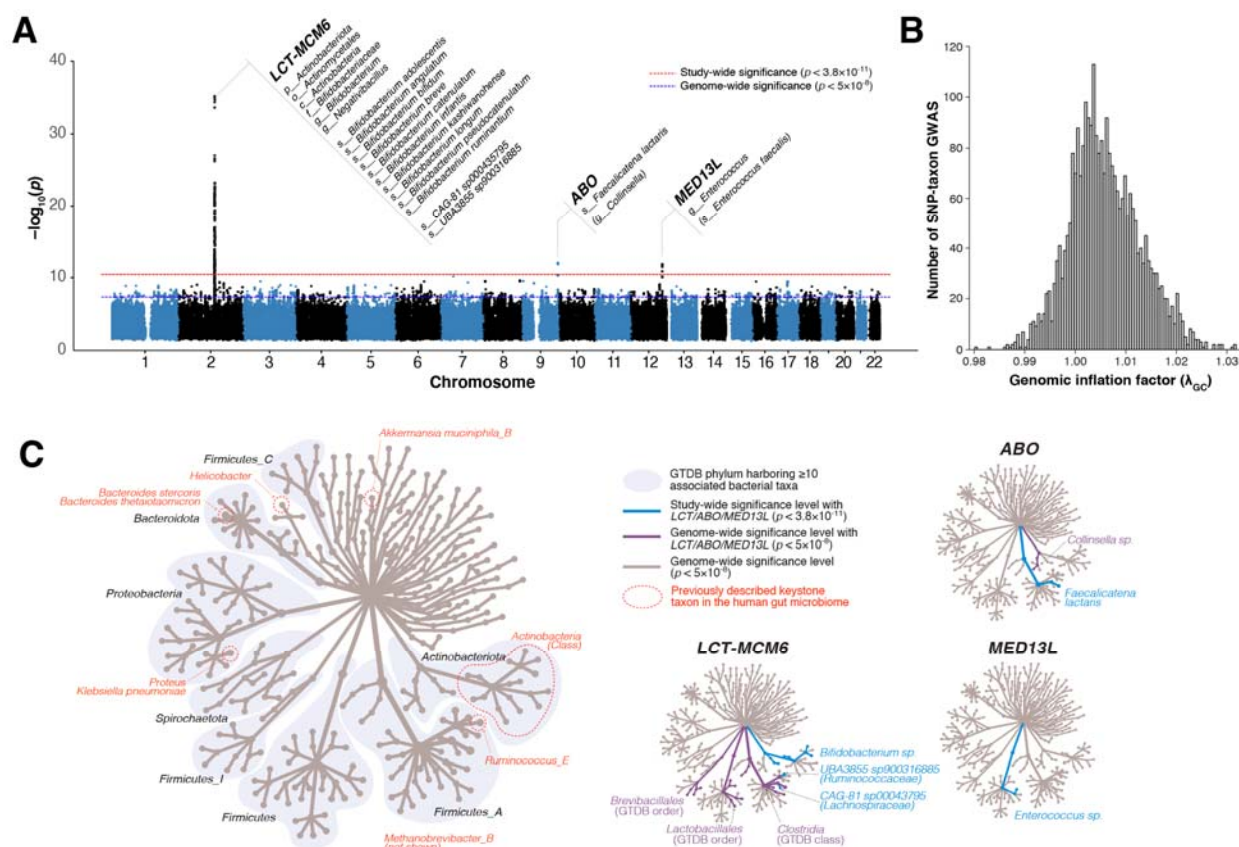



1043  
1044  
1045  
1046  
1047  
1048  
1049  
1050

**Figure 2. Interaction of human genotype, dairy diet and gut bacterial variation with the *LCT* locus.** (A) The 4 panels present variation in microbial abundances for the 4 most significantly associated taxa with the *LCT* locus: *Bifidobacterium*, *Negativibacillus*, *UBA3855 sp900316885* and *CAG-81 sp000435795*. Abundances are compared across stratified groups of individuals from the FR02 cohort according to *LCT-MCM6:rs4988235* genotype and self-reported dietary lactose intake (red: regular dairy diet, blue: lactose-free diet). Sample sizes for groups of individuals self-reporting a regular dairy diet: rs4988235:TT (n=1,786), CT (n=2,413), CC (n=736); self-reporting a non-regular dairy diet or lactose-free diet: TT (n=150), CT (n=198), CC (n=245). All statistical comparisons denote the p-values of Wilcoxon rank test on the distributions of untransformed relative abundances. P-values thresholds are abbreviated as follow: \*:p≤0.05; \*\*:p≤0.01; \*\*\*:p≤0.001; \*\*\*\*:p≤0.0001. Only significantly different comparisons are indicated. (B) Host genetics and gut microbes interact in the context of dairy intake and lactose intolerance.

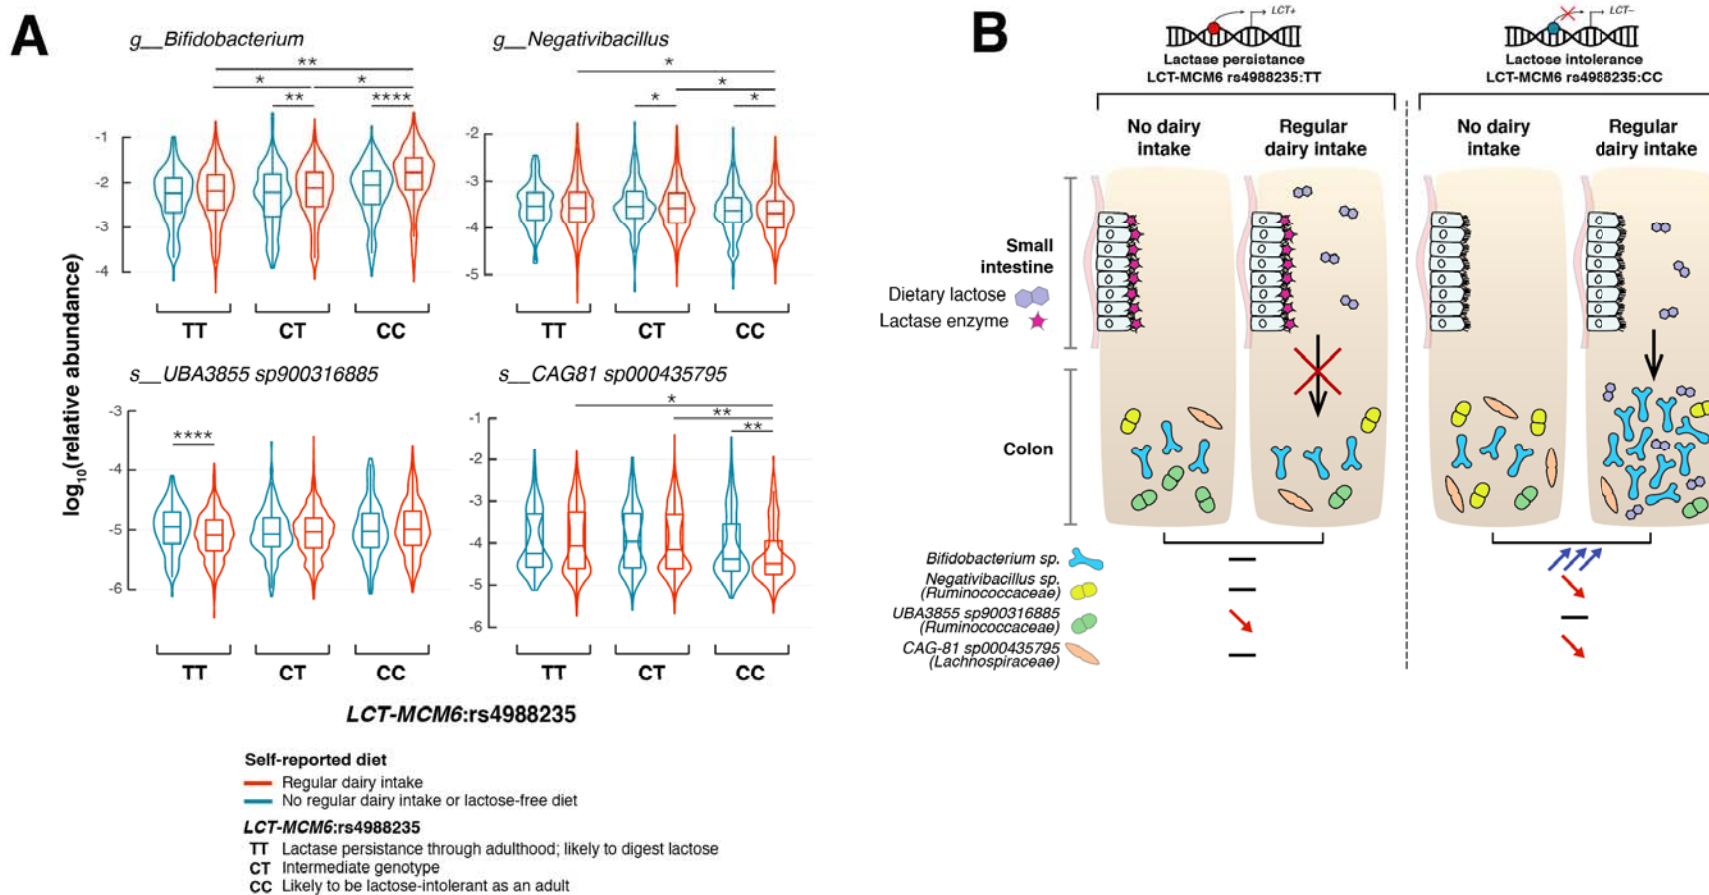

1051



1052 **Figure 3. Functional profiling and effect of host genetics and dietary fiber intake on gut abundance variation of two bacterial taxa associated with the ABO locus**  
1053 (A) Carbohydrate-active enzymes (CAZyme) distribution patterns in previously published *F. lactaris* and *Collinsella* reference genomes which were included in the GTDB  
1054 release 89 index used to classify metagenomes in this study. The heatmap indicates species abundance in corresponding CAZyme families, corresponding to the total count  
1055 of detected families for each species divided by the number of reference genomes examined for the same species. Values <1 indicate that less than one copy per genome of  
1056 the corresponding CAZyme family was detected for each, values >1 indicate that more than one copy per genome was detected. Preferred substrate groups are based on  
1057 literature search and descriptions on CAZypedia.org. (B) ABO-associated *F. lactaris* abundances are compared across stratified groups of individuals from the FR02 cohort  
1058 according to (left panel): ABO:rs4988235 genotype and predicted secretor status (blue: secretor status conferred by FUT2 rs601338:AG/AA genotype; red: non-secretor  
1059 status conferred by FUT2 rs601338:GG genotype) and (right panel) according to predicted A, AB, B and O blood types, and predicted secretor status. Sample sizes for  
1060 compared groups of individuals: secretor status with rs545971:C/C (n=1,538), C/T (n=2,493), T/T (n=1,050) and blood group A (n=2,178), AB (n=460), B (n=900), O  
1061 (n=1,543); non-secretor status with rs545971:C/C (n=266), C/T (n=437), T/T (n=175) and blood group A (n=383), AB (n=80), B (n=148), O (n=267). (C) ABO-associated  
1062 *F. lactaris* and *Collinsella sp.* abundances, as well as compounded abundances from 13 mucin-degrading species from Tailford *et al.* (2015), are compared across stratified  
1063 groups of individuals from the FR02 cohort according to the predicted A/B/AB-antigen secretion status and dietary fiber intake. The A/B/AB-antigen secretion status was  
1064 defined to segregate individuals according to the predicted phenotype of releasing soluble A/B/AB oligosaccharides branched onto a H-antigen into the gut mucosa.  
1065 A/B/AB-antigen secretors were defined as secretor individuals from blood types A, AB and B. Non- A/B/AB-antigen secretors were defined as non-secretor individuals and  
1066 O-antigen secretors. Fiber intake was compared in individual groups from the top and bottom quartiles of total fiber score based on dietary questionnaires and approximating  
1067 the amount of fiber in an individual's diet. Sample sizes for compared groups of individuals: A/B/AB-antigen secretors (n=1393) following a low-fiber diet (n=723) or a  
1068 fiber-rich diet (n=670), or non- A/B/AB-antigen secretors (n=952) following a low-fiber diet (n=490) or a fiber-rich diet (n=462). All statistical comparisons denote the p-  
1069 values of Wilcoxon rank test on the distributions of untransformed relative abundances. P-values thresholds are abbreviated as follow: \*, $p \leq 0.05$ ; \*\*, $p \leq 0.01$ ; \*\*\*, $p \leq 0.001$ ;  
1070 \*\*\*\*, $p \leq 0.0001$ . Only significantly different comparisons are indicated. (D) Host genetics and gut microbes interact in the context of fiber intake, secretor status and blood  
1071 types.  
1072

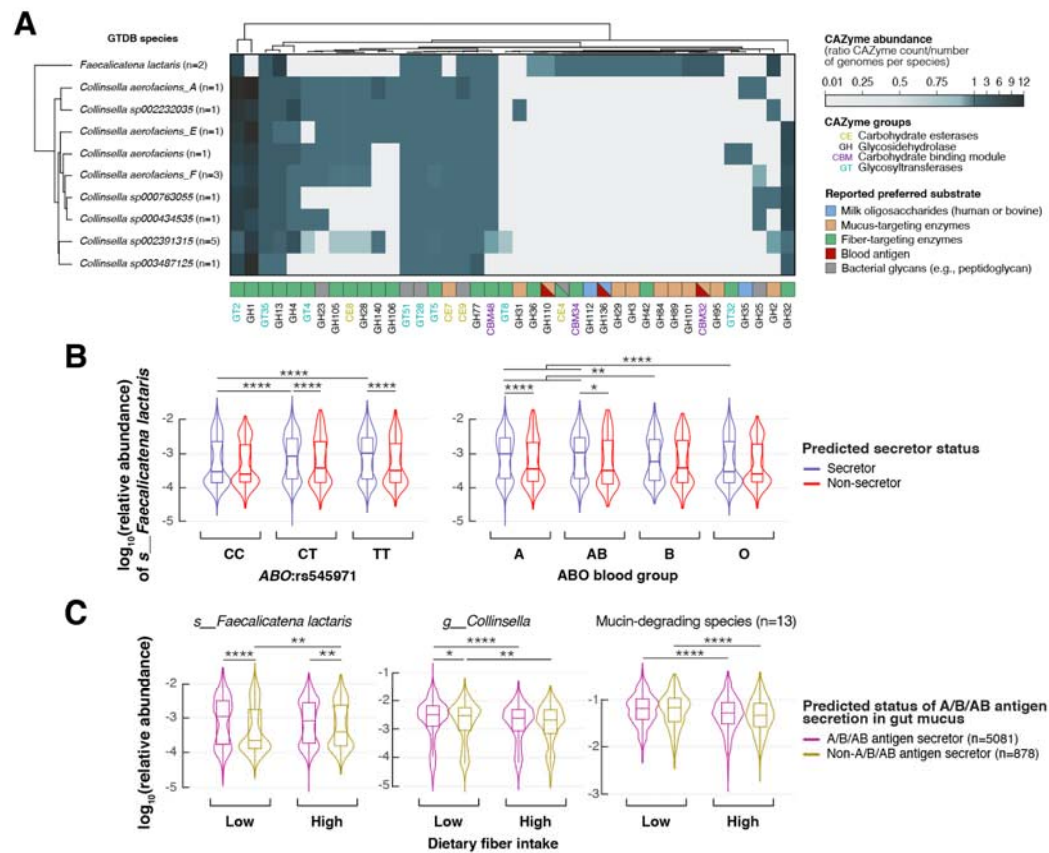

1074 **Figure 4. Effect of host genetics and prevalent colorectal cancer on gut levels of *Enterococcus faecalis* associated with *MED13L* variation across participants of the**  
 1075 **FR02 cohort.** Abundances are compared across individuals grouped according to (left panel): *MED13L*:rs143507801 genotype, (right panel): colorectal cancer (CRC,  
 1076 prevalence according to the Finnish Cancer Registry). The comparison between *E. faecalis* variation and *MED13L*:rs143507801 reflects the GWAS results (Table S1). The  
 1077 comparison of *E. faecalis* abundances in individuals with or without CRC at baseline was performed using a Wilcoxon rank test. Sample sizes for compared groups of  
 1078 individuals: rs143507801:A/A (n=5,825), G/A (n=130) (Note: only 1/5959 individual in our cohort was G/G); with CRC (n=14), without CRC at baseline (n=5,941).

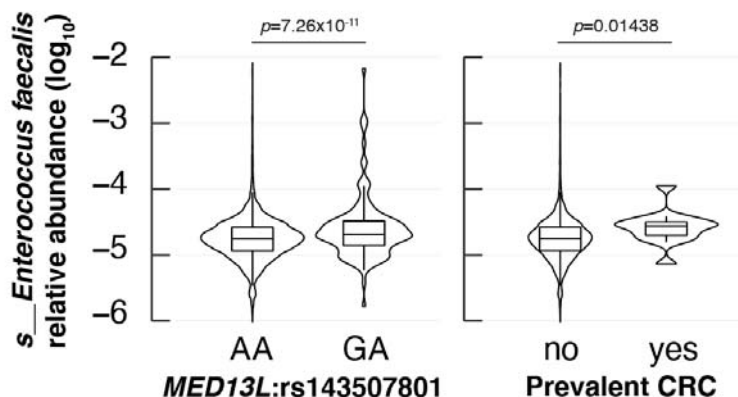

1079 **Figure 5. MR-based causal effects and incident depression analysis link *Morganella* with major depressive disorder.** The plot shows results for 5 concurring MR  
 1080 methods and hazard ratio for incident MDD in the FR02 cohort up to 16 years after baseline sampling using Cox model.  
 1081  
 1082

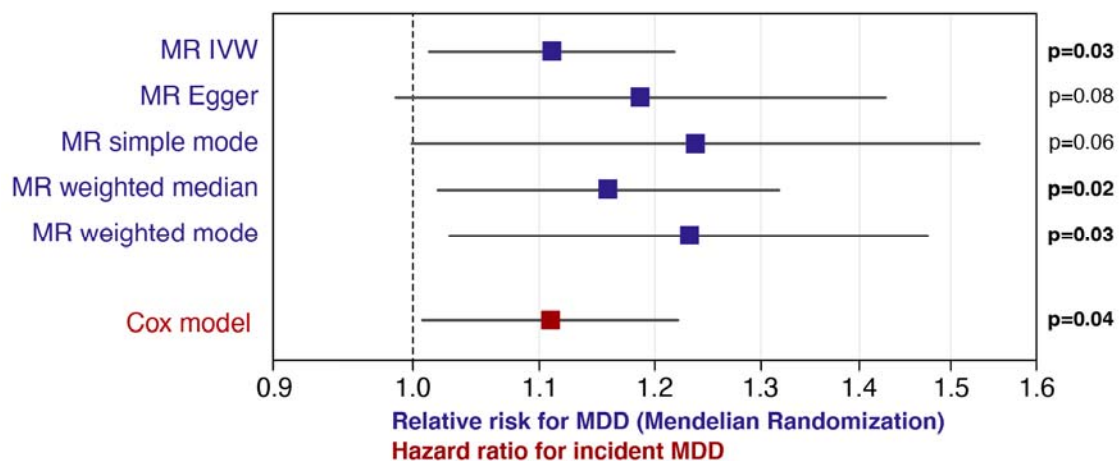

1083

1084  
1085  
1086

**Table 1.** Study-wide significant SNP-taxon associations after GWAS. A full table including the associated genotypes and bacterial taxa at genome-wide significance level as well as the full GTDB taxonomic path of all taxa are included in Table S1.

| Locus           | Chromosome | Top associated variant (rsID) | Effect allele | Non-effect allele | Associated bacterial taxon (GTDB release 89 nomenclature) | GTDB phylum               | If different, best matching taxon synonym(s) from NCBI nomenclature*                                                                                  | beta   | SE    | P                      |
|-----------------|------------|-------------------------------|---------------|-------------------|-----------------------------------------------------------|---------------------------|-------------------------------------------------------------------------------------------------------------------------------------------------------|--------|-------|------------------------|
| <i>LCT-MCM6</i> | 2          | rs3940549                     | G             | A                 | <i>c_Actinobacteria</i>                                   | <i>p_Actinobacteriota</i> | -                                                                                                                                                     | 0.086  | 0.007 | 5.02×10 <sup>-35</sup> |
| <i>LCT-MCM6</i> | 2          | rs3940549                     | G             | A                 | <i>o_Actinomycetales</i>                                  | <i>p_Actinobacteriota</i> | <i>o_Bifidobacteriales</i> ; <i>o_Micrococcales</i>                                                                                                   | 0.123  | 0.010 | 3.74×10 <sup>-32</sup> |
| <i>LCT-MCM6</i> | 2          | rs3940549                     | G             | A                 | <i>g_Bifidobacterium</i>                                  | <i>p_Actinobacteriota</i> | -                                                                                                                                                     | 0.180  | 0.015 | 1.69×10 <sup>-31</sup> |
| <i>LCT-MCM6</i> | 2          | rs3940549                     | G             | A                 | <i>s_Bifidobacterium_ruminantium</i>                      | <i>p_Actinobacteriota</i> | -                                                                                                                                                     | 0.150  | 0.014 | 2.00×10 <sup>-28</sup> |
| <i>LCT-MCM6</i> | 2          | rs3940549                     | G             | A                 | <i>s_Bifidobacterium_breve</i>                            | <i>p_Actinobacteriota</i> | -                                                                                                                                                     | 0.118  | 0.011 | 8.01×10 <sup>-28</sup> |
| <i>LCT-MCM6</i> | 2          | rs62168795                    | C             | T                 | <i>f_Bifidobacteriaceae</i>                               | <i>p_Actinobacteriota</i> | -                                                                                                                                                     | 0.160  | 0.015 | 8.96×10 <sup>-28</sup> |
| <i>LCT-MCM6</i> | 2          | rs3940549                     | G             | A                 | <i>p_Actinobacteriota</i>                                 | <i>p_Actinobacteriota</i> | <i>p_Actinobacteria</i>                                                                                                                               | 0.051  | 0.005 | 1.20×10 <sup>-22</sup> |
| <i>LCT-MCM6</i> | 2          | rs3940549                     | G             | A                 | <i>s_Bifidobacterium_infantis</i>                         | <i>p_Actinobacteriota</i> | <i>s_Bifidobacterium_longum</i>                                                                                                                       | 0.112  | 0.011 | 2.37×10 <sup>-22</sup> |
| <i>LCT-MCM6</i> | 2          | rs3940549                     | G             | A                 | <i>s_Bifidobacterium_angulatum</i>                        | <i>p_Actinobacteriota</i> | -                                                                                                                                                     | 0.137  | 0.014 | 4.40×10 <sup>-22</sup> |
| <i>LCT-MCM6</i> | 2          | rs3940549                     | G             | A                 | <i>s_Bifidobacterium_kashiwanohense</i>                   | <i>p_Actinobacteriota</i> | -                                                                                                                                                     | 0.134  | 0.015 | 5.92×10 <sup>-20</sup> |
| <i>LCT-MCM6</i> | 2          | rs182549                      | C             | T                 | <i>s_Bifidobacterium_adolescentis</i>                     | <i>p_Actinobacteriota</i> | -                                                                                                                                                     | 0.207  | 0.023 | 6.11×10 <sup>-20</sup> |
| <i>LCT-MCM6</i> | 2          | rs62168795                    | C             | T                 | <i>s_UBA3855_sp900316885</i>                              | <i>p_Firmicutes_A</i>     | Uncultured <i>Clostridiales</i> bacterium                                                                                                             | 0.055  | 0.006 | 7.17×10 <sup>-19</sup> |
| <i>LCT-MCM6</i> | 2          | rs3940549                     | G             | A                 | <i>s_Bifidobacterium_pseudocatenulatum</i>                | <i>p_Actinobacteriota</i> | -                                                                                                                                                     | 0.154  | 0.017 | 8.65×10 <sup>-19</sup> |
| <i>LCT-MCM6</i> | 2          | rs3940549                     | G             | A                 | <i>s_Bifidobacterium_catenulatum</i>                      | <i>p_Actinobacteriota</i> | -                                                                                                                                                     | 0.169  | 0.019 | 1.20×10 <sup>-18</sup> |
| <i>LCT-MCM6</i> | 2          | rs3940549                     | G             | A                 | <i>s_CAG-81_sp000435795</i>                               | <i>p_Firmicutes_A</i>     | Uncultured <i>g_Clostridium</i> sp. CAG:58                                                                                                            | -0.151 | 0.017 | 3.72×10 <sup>-18</sup> |
| <i>LCT-MCM6</i> | 2          | rs3940549                     | G             | A                 | <i>s_Bifidobacterium_longum</i>                           | <i>p_Actinobacteriota</i> | -                                                                                                                                                     | 0.131  | 0.015 | 1.41×10 <sup>-17</sup> |
| <i>LCT-MCM6</i> | 2          | rs4988235                     | G             | A                 | <i>s_Bifidobacterium_bifidum</i>                          | <i>p_Actinobacteriota</i> | -                                                                                                                                                     | 0.166  | 0.020 | 1.31×10 <sup>-16</sup> |
| <i>ABO</i>      | 9          | rs545971                      | T             | C                 | <i>s_Faecalicatena_lactaris</i>                           | <i>p_Firmicutes_A</i>     | <i>s_Ruminococcus lactaris</i> (NCBI)<br><i>s_Ruminococcus_B lactaris</i> (GTDB release 86)<br><i>s_Mediterraneibacter lactaris</i> (GTDB release 95) | 0.105  | 0.015 | 1.10×10 <sup>-12</sup> |
| <i>MED13L</i>   | 12         | rs187309577                   | T             | C                 | <i>g_Enterococcus</i>                                     | <i>p_Firmicutes</i>       | -                                                                                                                                                     | 0.177  | 0.025 | 1.84×10 <sup>-12</sup> |
| <i>LCT-MCM6</i> | 2          | rs182549                      | C             | T                 | <i>g_Negativibacillus</i>                                 | <i>p_Firmicutes_A</i>     | <i>g_Negativibacillus</i> ; <i>g_Clostridium</i>                                                                                                      | -0.081 | 0.012 | 5.22×10 <sup>-12</sup> |

\* NCBI-GTDB taxonomic synonyms were retrieved using the GTDB Taxon History tool: [https://gtdb.ecogenomic.org/taxon\\_history/](https://gtdb.ecogenomic.org/taxon_history/)

1087
